# Supplementary material for: Transcriptomic Analyses Reveal Insights into the Shared Regulatory Network of Phenolic Compounds and Steviol Glycosides in Stevia rebaudiana
Source: MDPI journal article supplement (doi:10.3390/ijms25042136), 2024-02-10
Supplement: s1 [file s1]

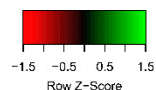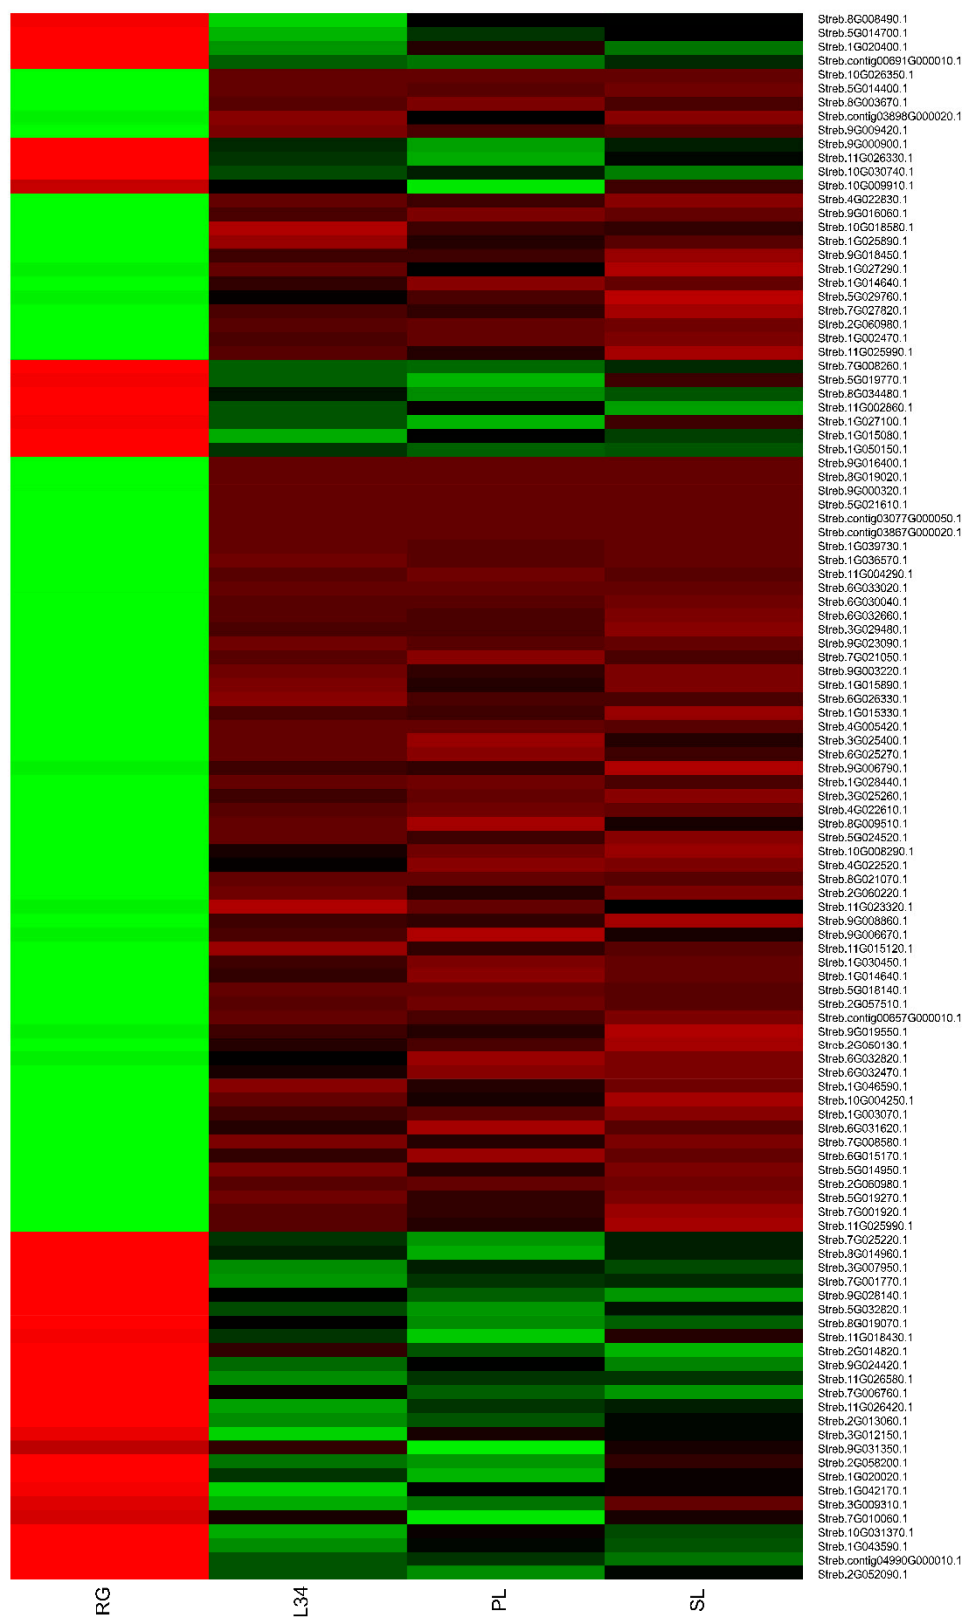

**Supplementary Figure 3.** Expression patterns of DEGs belonging to all analyzed MapMan bins for the four genotypes.
