# Supplementary material for: Transcriptomic Analyses Reveal Insights into the Shared Regulatory Network of Phenolic Compounds and Steviol Glycosides in Stevia rebaudiana
Source: MDPI journal article supplement (doi:10.3390/ijms25042136), 2024-02-10
Supplement: s1 [file s1]

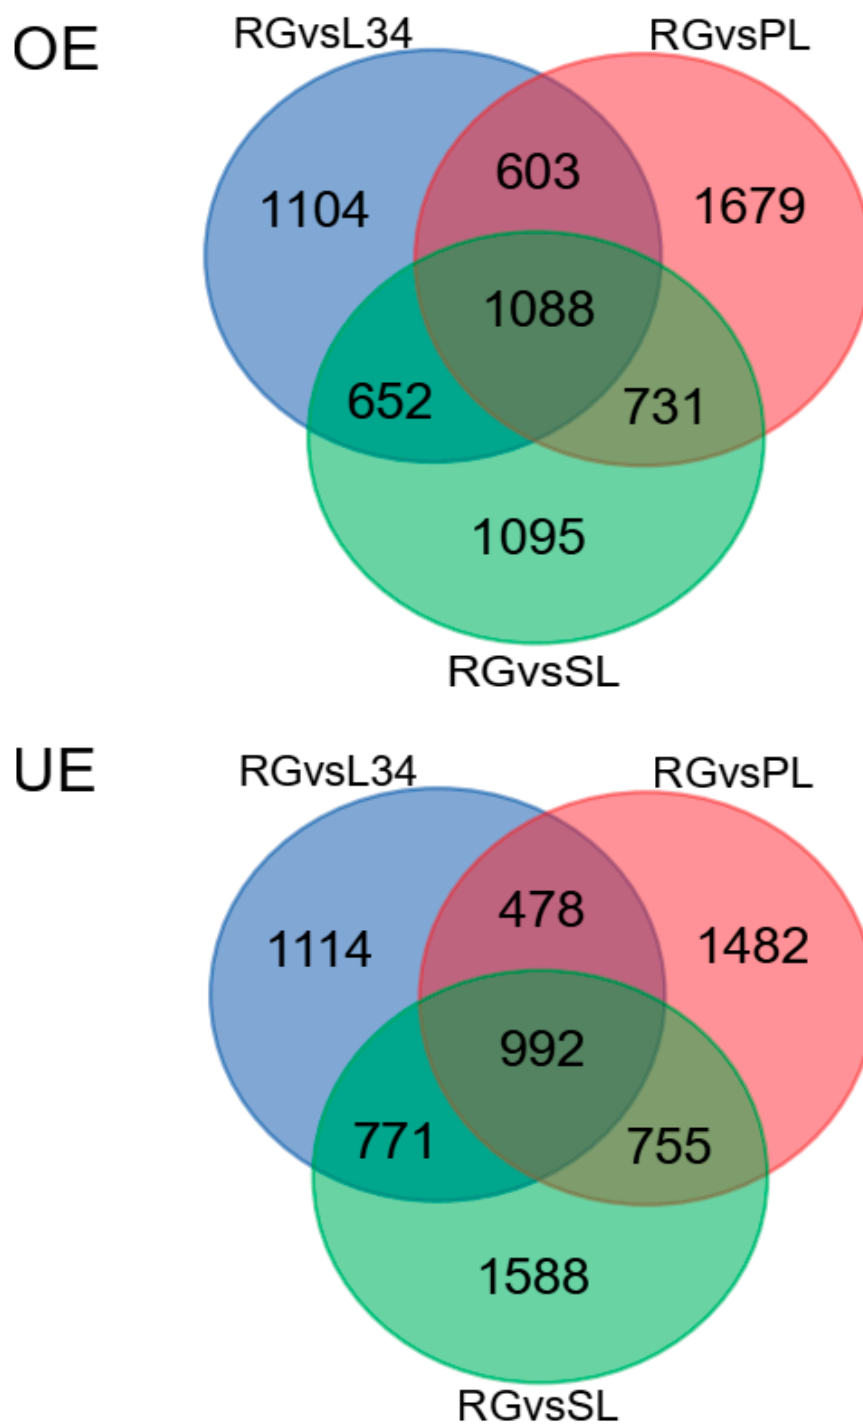

**Supplementary Figure 1.** Venn diagram of over (OE) and under-expressed (UE) genes of *Stevia rebaudiana* by three independent comparisons of RG to PL, SL, and L34.
