# Supplementary material for: Transcriptomic Analyses Reveal Insights into the Shared Regulatory Network of Phenolic Compounds and Steviol Glycosides in Stevia rebaudiana
Source: MDPI journal article supplement (doi:10.3390/ijms25042136), 2024-02-10
Supplement: s1 [file s1]

## OE

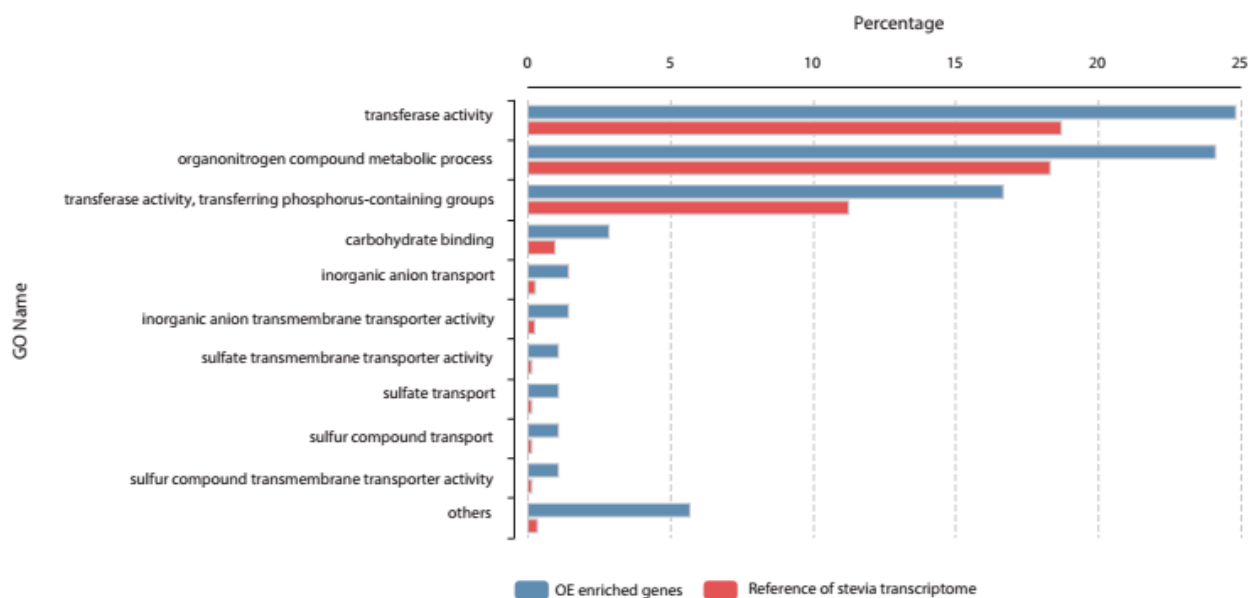

## UE

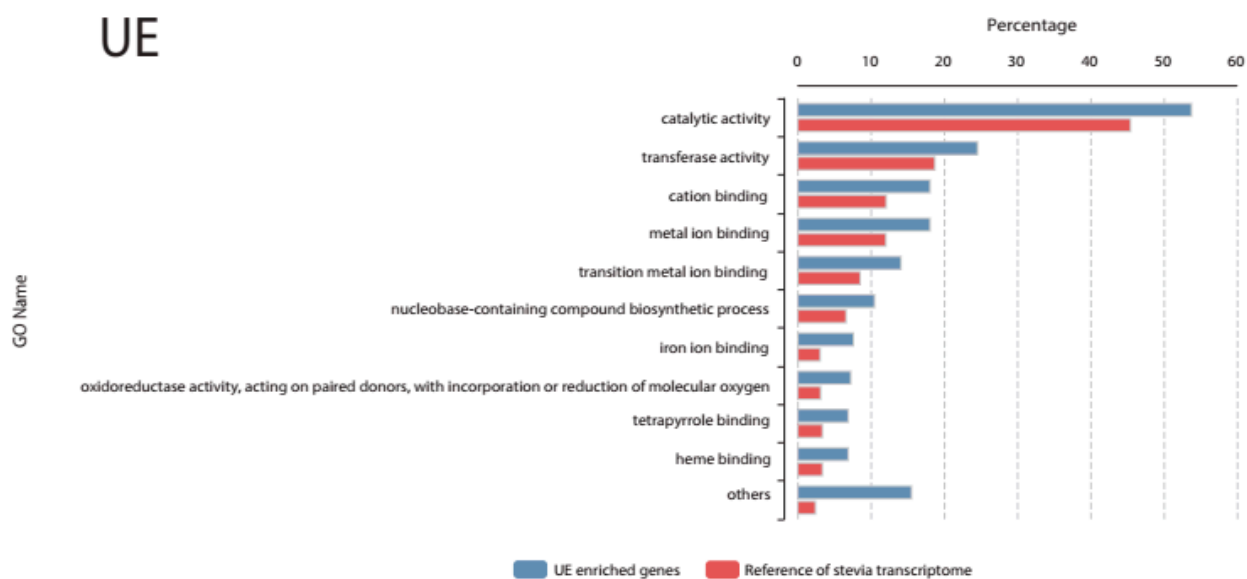

**Supplementary Figure 2.** Distribution of differentially expressed genes in Gene Ontology classes. Enriched GO bar charts of OE and UE genes in stevia leaves obtained with BLAST2GO (P-value 0.01).
