# Supplementary material for: Transcriptomic Analyses Reveal Insights into the Shared Regulatory Network of Phenolic Compounds and Steviol Glycosides in Stevia rebaudiana
Source: MDPI journal article supplement (doi:10.3390/ijms25042136), 2024-02-10
Supplement: s1 [file s1]

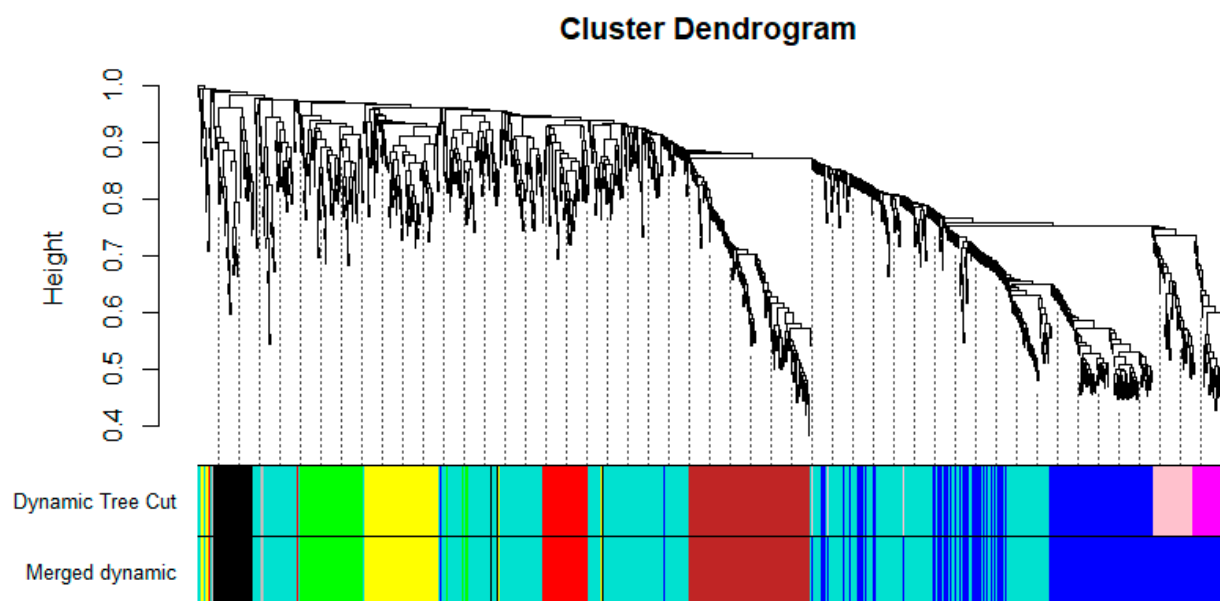

**Supplementary Figure 4.** Hierarchical cluster dendrogram for the combination of  $\text{minModuleSize} = 30$  and  $\text{MEDissThres} = 0.1$  showing correlation modules identified by WGCNA. Each colored row represents a color-coded module which contains a group of highly connected genes.
