# Supplementary material for: Transcriptomic Analyses Reveal Insights into the Shared Regulatory Network of Phenolic Compounds and Steviol Glycosides in Stevia rebaudiana
Source: MDPI journal article supplement (doi:10.3390/ijms25042136), 2024-02-10
Supplement: s1 [file s1]

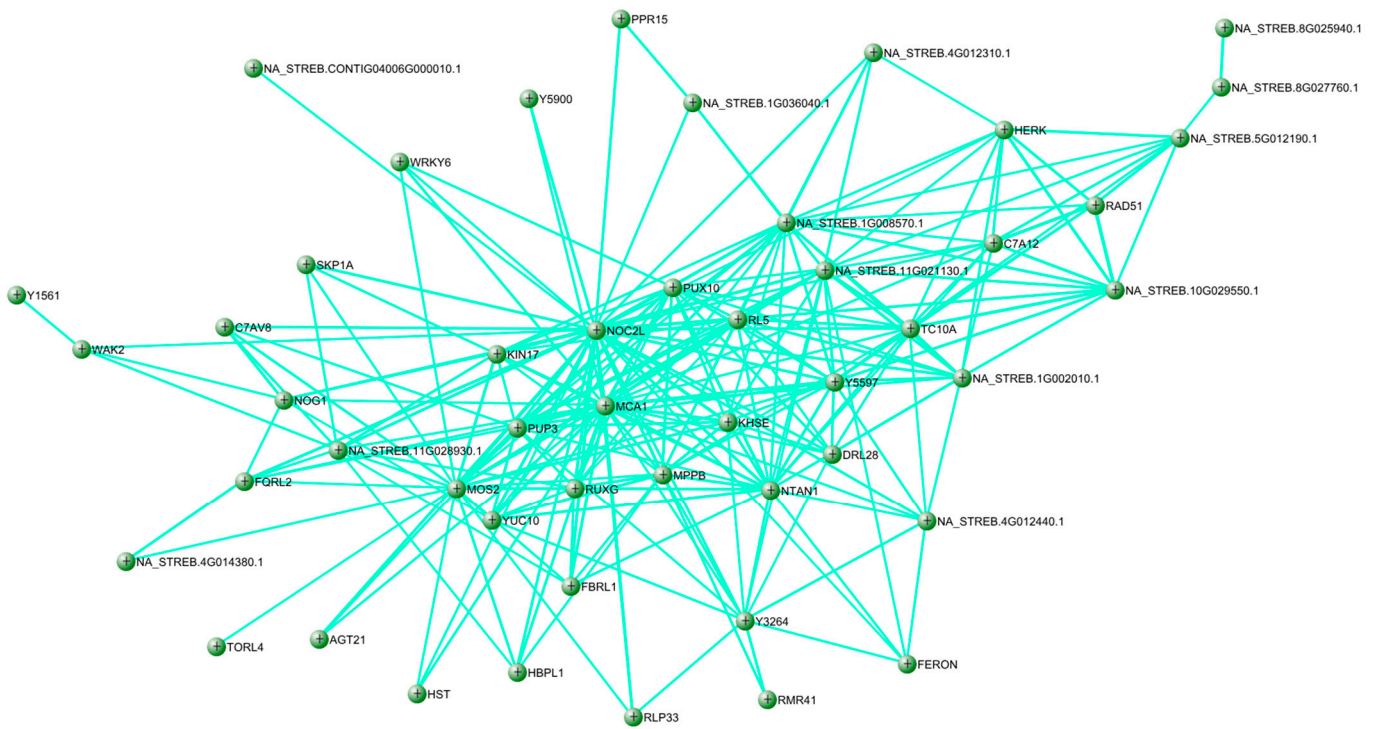

**Supplementary Figure 5.** Co-expression network of the red module eigengenes. The network shows the interaction that was detected between the eigengenes in the module with a cutoff of 0.15. Each node represents a gene in the network. NA: not annotated.
