# Supplementary material for: Transcriptomic Analyses Reveal Insights into the Shared Regulatory Network of Phenolic Compounds and Steviol Glycosides in Stevia rebaudiana
Source: Int J Mol Sci. 2024 Feb 10;25(4):2136. doi: 10.3390/ijms25042136 (PMC10889303; doi:10.3390/ijms25042136)
Supplement: Supplementary file 1 [file ijms-25-02136-s001.zip]

Archive with 6 entries (6 files):
- Supplementary Figure_1.pdf
- Supplementary Figure_2.pdf
- Supplementary_Figure_3.pdf
- Supplementary_Figure_4.pdf
- Supplementary_Figure_5.pdf
- Supplementary_Tables.xlsx
