# Supplementary material for: Transcriptomic Analyses Reveal Insights into the Shared Regulatory Network of Phenolic Compounds and Steviol Glycosides in Stevia rebaudiana
Source: Int J Mol Sci. 2024 Feb 10;25(4):2136. doi: 10.3390/ijms25042136 (PMC10889303; doi:10.3390/ijms25042136)
Supplement: Supplementary file 1 [file ijms-25-02136-s001.zip › Supplementary_Tables.xlsx]

## Sheet: ST1
	Supplementary Table 1. Summary table of Illumina sequencing and reads mapping against the Stevia rebaudiana transcriptome. The numbers 1,2,3 refer to replicates counting.
	Library	number of raw reads	number of reads after the trimming	number of mapped reads on stevia transcriptome	% of reads mapped on stevia transcriptome
	L34_1	27178922	17392102	1.38998e+07	79.92
	L34_2	26269085	16738273	1.32919e+07	79.41
	L34_3	32613058	21260565	1.62069e+07	76.23
	SL_1	27517216	17604755	1.43021e+07	81.24
	SL_2	27981094	17684418	1.34702e+07	76.17
	SL_3	29633728	19067937	1.50141e+07	78.74
	PL_1	27006317	17451913	1.38446e+07	79.33
	PL_2	26261459	17056598	1.39165e+07	81.59
	PL_3	27634527	17718235	1.4288e+07	80.64
	RG_1	23540939	15296980	1.25007e+07	81.72
	RG_2	29453839	19267056	1.54888e+07	80.39
	RG_3	34425333	22197334	1.68034e+07	75.7
	Mean	2.8293e+07	1.8228e+07	1.44189e+07	79.2567

## Sheet: ST2
	Supplementary Table 2. List of the filtered common differentially expressed genes. Genes are listed by decreasing log2FC; log2FC= log2Fold Change, FDR= False Discovery Rate, OE= differentially overexpressed genes, UE= differentially underexpressed genes; N/A = Not Available
	Transcript ID	Gene Code	Transcript Description	mean log2FC	mean FDR	Expression
	Streb.8G031870.1	AKR2A	Ankyrin repeat domain-containing protein	8.82229	2.7301e-16	OE
	Streb.Contig04134G000010.1	WTR38	WAT1-related protein At5g07050 OS=Arabidopsis	2.20702	4.65432e-18	OE
	Streb.9G018510.1	PUX4	Plant UBX domain-containing protein	12.3397	8.31669e-105	OE
	Streb.11G025120.1	Y4960	Putative receptor-like protein kinase	1.90208	0.00546661	OE
	Streb.4G018330.1	N/A	N/A	1.19389	3.61466e-08	OE
	Streb.Contig00369G000010.1	KHSE	Homoserine kinase OS=Arabidopsis thaliana	1.92737	2.07262e-10	OE
	Streb.8G009410.1	XB31	Putative E3 ubiquitin-protein ligase	2.08532	0.00226233	OE
	Streb.Contig06136_ERROPOS2300000G000100.1	N/A	N/A	1.83698	0.0232377	OE
	Streb.3G007950.1	N/A	N/A	1.31589	0.0139787	OE
	Streb.1G013550.1	N/A	N/A	6.93413	0.0216226	OE
	Streb.10G028460.1	SYGM1	Glycine--tRNA ligase, mitochondrial 1	10.1342	2.46306e-76	OE
	Streb.3G013490.1	N/A	N/A	1.86895	0.000231978	OE
	Streb.5G024240.1	SAMC1	S-adenosylmethionine carrier 1, chloroplastic/mitochondrial	1.26372	0.000852776	OE
	Streb.2G010680.1	N/A	N/A	2.13198	2.01889e-05	OE
	Streb.3G008040.1	N/A	N/A	3.45054	0.0151579	OE
	Streb.3G030380.1	TXLNA	Alpha-taxilin OS=Mus musculus OX=10090	1.28461	3.36669e-06	OE
	Streb.10G017060.1	Y5900	Putative receptor-like protein kinase	1.40789	0.0165799	OE
	Streb.6G027770.1	N/A	N/A	2.73196	0.00706256	OE
	Streb.4G002920.1	CSC1	Calcium permeable stress-gated cation	1.8824	3.81336e-05	OE
	Streb.11G002860.1	PIN3	Auxin efflux carrier component	2.0845	0.000300718	OE
	Streb.5G003110.1	TAS	Protein tas OS=Shigella flexneri	1.94957	0.00171153	OE
	Streb.3G018400.1	N/A	N/A	1.69962	0.0338432	OE
	Streb.11G031170.1	PAPS4	Nuclear poly(A) polymerase 4	2.10904	0.000100693	OE
	Streb.10G011270.1	N/A	N/A	1.27311	0.00944146	OE
	Streb.Contig05069G000020.1	KPRS3	Ribose-phosphate pyrophosphokinase 3, mitochondrial	1.60229	0.00688345	OE
	Streb.6G010240.1	ASPRX	Aspartic proteinase OS=Oryza sativa	2.17465	0.00301945	OE
	Streb.7G002850.1	C7A94	Beta-amyrin 28-monooxygenase OS=Kalopanax septemlobus	1.48307	0.00699503	OE
	Streb.3G008270.1	N/A	N/A	3.09014	4.33343e-05	OE
	Streb.1G018360.1	NDUA6	NADH dehydrogenase [ubiquinone] 1	12.0738	1.52716e-149	OE
	Streb.1G008570.1	N/A	N/A	6.57976	3.5051e-25	OE
	Streb.2G050240.1	CB60A	Calmodulin-binding protein 60 A	1.79782	4.69614e-05	OE
	Streb.10G011000.1	MD15A	Mediator of RNA polymerase	2.07027	8.13798e-05	OE
	Streb.11G010690.1	AGD5	ADP-ribosylation factor GTPase-activating protein	7.02245	0.00251106	OE
	Streb.Contig02177G000010.1	GALM	Galactose mutarotase OS=Mus musculus	2.51681	8.00829e-06	OE
	Streb.7G007170.1	DTX16	Protein DETOXIFICATION 16 OS=Arabidopsis	2.86707	7.32569e-11	OE
	Streb.8G011180.1	N/A	N/A	2.46002	0.0164573	OE
	Streb.1G010980.1	POLR1	Retrovirus-related Pol polyprotein from	7.11523	2.4739e-09	OE
	Streb.9G006880.1	POLR1	Retrovirus-related Pol polyprotein from	5.92624	2.99603e-08	OE
	Streb.1G029500.1	IF2B	Eukaryotic translation initiation factor	1.24139	3.63538e-08	OE
	Streb.3G029300.1	HSR4	Protein HYPER-SENSITIVITY-RELATED 4 OS=Arabidopsis	1.28305	0.000231215	OE
	Streb.11G015080.1	MES11	Putative methylesterase 11, chloroplastic	1.5627	0.000140067	OE
	Streb.2G021800.1	N/A	N/A	1.28589	0.0211713	OE
	Streb.5G017490.1	CAAT2	Cationic amino acid transporter	1.56642	8.58055e-06	OE
	Streb.1G027620.1	FBK50	F-box/kelch-repeat protein At3g06240 OS=Arabidopsis	5.82219	1.03761e-06	OE
	Streb.11G018760.1	ULP1D	Ubiquitin-like-specific protease 1D OS=Arabidopsis	1.91103	0.00104401	OE
	Streb.10G014630.1	PHOX1	Protein PHOX1 OS=Arabidopsis thaliana	2.13139	1.026e-18	OE
	Streb.2G024990.1	COB22	Coatomer subunit beta'-2 OS=Arabidopsis	1.27599	7.13498e-05	OE
	Streb.9G025650.1	CYSK	Cysteine synthase OS=Solanum tuberosum	2.82072	7.6624e-09	OE
	Streb.4G012480.1	NOP2C	rRNA (cytosine-C(5))-methyltransferase NOP2C OS=Arabidopsis	1.77623	0.000220051	OE
	Streb.10G003400.1	MT21A	Protein N-lysine methyltransferase METTL21A	1.34333	1.56451e-18	OE
	Streb.Contig05294G000020.1	Y3475	Probable LRR receptor-like serine/threonine-protein	4.10487	0.0051148	OE
	Streb.10G009670.1	THLP1	Thaumatin-like protein 1 OS=Arabidopsis	3.44227	0.000216461	OE
	Streb.4G012240.1	N/A	N/A	1.84242	1.48406e-07	OE
	Streb.9G026910.1	NRPB2	DNA-directed RNA polymerase II	5.07091	2.29424e-05	OE
	Streb.1G002550.1	RLP33	Receptor-like protein 33 OS=Arabidopsis	1.4266	0.00105921	OE
	Streb.Contig03018G000010.1	UPL3	E3 ubiquitin-protein ligase UPL3	2.03567	4.88838e-08	OE
	Streb.11G008680.1	N/A	N/A	4.5975	0.000386015	OE
	Streb.3G026410.1	RP6L2	Protein RRP6-like 2 OS=Arabidopsis	4.80368	0.0329615	OE
	Streb.4G023080.1	N/A	N/A	4.92269	0.00232315	OE
	Streb.2G058200.1	TGA7	Transcription factor TGA7 OS=Arabidopsis	2.99101	8.04303e-06	OE
	Streb.1G005760.1	WAK2	Wall-associated receptor kinase 2	4.88432	1.0075e-06	OE
	Streb.9G000130.1	MSH4	DNA mismatch repair protein	1.45291	0.00852525	OE
	Streb.2G032330.1	MDIS1	Protein MALE DISCOVERER 1	1.38142	0.0162498	OE
	Streb.3G003080.1	CIPK4	CBL-interacting serine/threonine-protein kinase 4	2.86926	0.00495363	OE
	Streb.11G003560.1	N/A	N/A	1.94608	4.81407e-05	OE
	Streb.10G028450.1	SYGM1	Glycine--tRNA ligase, mitochondrial 1	4.08666	0.00322652	OE
	Streb.5G014880.1	N/A	N/A	6.99786	0.0141361	OE
	Streb.5G008540.1	PGPS1	CDP-diacylglycerol--glycerol-3-phosphate 3-phosphatidyltransferase 1, chloroplastic	1.91801	1.35195e-08	OE
	Streb.6G025350.1	N/A	N/A	1.37516	9.96152e-10	OE
	Streb.2G009740.1	N/A	N/A	1.60728	0.00419759	OE
	Streb.1G046810.1	N/A	N/A	1.4685	0.0143586	OE
	Streb.3G012720.1	N/A	N/A	1.26436	0.000486357	OE
	Streb.1G009860.1	N/A	N/A	1.76407	0.0148118	OE
	Streb.8G001010.1	N/A	N/A	6.05169	0.000222238	OE
	Streb.10G028440.1	IDM1	Increased DNA methylation 1	2.57019	6.46001e-06	OE
	Streb.10G025300.1	HIP3	Heavy metal-associated isoprenylated plant	1.94155	0.0289757	OE
	Streb.8G001290.1	PATL6	Patellin-6 OS=Arabidopsis thaliana OX=3702	1.69319	1.49533e-05	OE
	Streb.1G017530.1	GRP3	Glycine-rich protein A3 OS=Daucus	1.34858	1.72318e-05	OE
	Streb.2G052090.1	CBWD1	COBW domain-containing protein 1	13.8697	3.21559e-127	OE
	Streb.1G030100.1	Y1675	G-type lectin S-receptor-like serine/threonine-protein	3.36276	0.0117229	OE
	Streb.8G008490.1	RUXG	Probable small nuclear ribonucleoprotein	2.23044	1.54196e-15	OE
	Streb.1G048820.1	E70H1	Exocyst complex component EXO70H1	3.14573	0.0116726	OE
	Streb.9G031350.1	LBD38	LOB domain-containing protein 38	2.8771	0.0105842	OE
	Streb.8G027190.1	N/A	N/A	3.57231	3.93201e-09	OE
	Streb.1G027100.1	IPT3	Adenylate isopentenyltransferase 3, chloroplastic	2.99718	0.000460417	OE
	Streb.9G013990.1	CAND1	Cullin-associated NEDD8-dissociated protein 1	8.10425	2.55915e-24	OE
	Streb.2G013060.1	GBF1	G-box-binding factor 1 OS=Arabidopsis	2.17714	0.0218502	OE
	Streb.1G017870.1	NTAN1	Protein N-terminal asparagine amidohydrolase	2.11459	9.42789e-47	OE
	Streb.10G009130.1	P2C34	Probable protein phosphatase 2C	1.94395	3.31503e-07	OE
	Streb.5G013430.1	RHA4A	Probable E3 ubiquitin-protein ligase	2.84958	0.00135737	OE
	Streb.2G017310.1	RH41	DEAD-box ATP-dependent RNA helicase	3.16527	0.00132284	OE
	Streb.2G029560.1	HGNAT	Heparan-alpha-glucosaminide N-acetyltransferase OS=Mus musculus	3.18641	6.25204e-27	OE
	Streb.2G006510.1	PP171	Pentatricopeptide repeat-containing protein At2g26790,	1.44689	0.0212431	OE
	Streb.2G010400.1	N/A	N/A	2.39678	0.00012863	OE
	Streb.10G007490.1	HLB1	Protein HLB1 OS=Arabidopsis thaliana	3.73285	7.39931e-33	OE
	Streb.Contig04862G000030.1	GOGC4	Golgin candidate 4 OS=Arabidopsis	1.60155	0.00244267	OE
	Streb.9G028140.1	MTEF2	Transcription termination factor MTERF2,	1.38877	2.36257e-06	OE
	Streb.8G025730.1	ERMP1	Endoplasmic reticulum metallopeptidase 1	2.11383	2.71737e-06	OE
	Streb.3G019440.1	N/A	N/A	1.77884	0.0099529	OE
	Streb.2G045450.1	TF211	Transposon Tf2-11 polyprotein OS=Schizosaccharomyces	3.70498	0.000320301	OE
	Streb.6G000900.1	N/A	N/A	4.3787	3.77451e-38	OE
	Streb.1G002500.1	CF0	Receptor-like protein Cf-9 homolog	2.01507	9.04686e-10	OE
	Streb.7G004490.1	PTR2	Protein NRT1/ PTR FAMILY	10.0977	5.32903e-25	OE
	Streb.6G011190.1	SCAR2	Protein SCAR2 OS=Arabidopsis thaliana	1.65157	1.28784e-05	OE
	Streb.10G018700.1	N/A	N/A	1.82547	0.0209997	OE
	Streb.4G019440.1	GSTT3	Glutathione S-transferase T3 OS=Arabidopsis	1.18696	0.000103917	OE
	Streb.9G026450.1	EI24	Protein EI24 homolog OS=Arabidopsis	1.61028	0.00265388	OE
	Streb.1G002820.1	RLP33	Receptor-like protein 33 OS=Arabidopsis	1.73722	4.35235e-06	OE
	Streb.7G006760.1	TGA1A	TGACG-sequence-specific DNA-binding protein TGA-1A	2.17082	7.56087e-07	OE
	Streb.8G032050.1	SCP34	Serine carboxypeptidase-like 34 OS=Arabidopsis	1.6248	0.00221707	OE
	Streb.8G010020.1	PCL1	Transcription factor LUX OS=Arabidopsis	3.99224	0.0161134	OE
	Streb.9G015060.1	SFH2	Phosphatidylinositol/phosphatidylcholine transfer protein SFH2	1.61955	1.93979e-24	OE
	Streb.Contig00024G000030.1	N/A	N/A	2.90921	0.0289015	OE
	Streb.1G009400.1	TRA1	Putative AC transposase OS=Zea	1.39267	0.00790524	OE
	Streb.10G031370.1	MYB12	Transcription factor MYB12 OS=Arabidopsis	6.57164	0.00031983	OE
	Streb.3G021560.1	N/A	N/A	1.66367	1.18099e-26	OE
	Streb.1G043590.1	MED7B	Mediator of RNA polymerase	8.63278	5.30894e-10	OE
	Streb.6G010110.1	DPOLL	DNA polymerase lambda OS=Arabidopsis	2.62127	0.0120288	OE
	Streb.2G034770.1	N/A	N/A	7.59411	1.70801e-05	OE
	Streb.1G019720.1	N/A	N/A	7.57464	4.82165e-07	OE
	Streb.4G014950.1	GALM	Galactose mutarotase OS=Mus musculus	2.42262	1.77661e-05	OE
	Streb.1G021880.1	FERON	Receptor-like protein kinase FERONIA	1.90246	0.0139499	OE
	Streb.3G012150.1	WRKY6	WRKY transcription factor 6	2.61931	7.96205e-05	OE
	Streb.1G027540.1	N/A	N/A	4.25917	9.10775e-05	OE
	Streb.6G024240.1	TMVRN	TMV resistance protein N	6.84573	0.0273956	OE
	Streb.9G000500.1	UNC13	Protein unc-13 homolog OS=Arabidopsis	1.51691	0.00151481	OE
	Streb.5G031470.1	C7A94	Beta-amyrin 28-monooxygenase OS=Kalopanax septemlobus	1.67584	0.0199799	OE
	Streb.2G000270.1	N/A	N/A	2.26404	0.0169928	OE
	Streb.4G000450.1	N/A	N/A	2.87103	0.016849	OE
	Streb.4G012310.1	N/A	N/A	1.45917	3.16465e-05	OE
	Streb.5G005390.1	R1A4	Putative late blight resistance	3.37348	1.3609e-06	OE
	Streb.5G002800.1	FHYRK	Bifunctional riboflavin kinase/FMN phosphatase	3.3131	2.35538e-25	OE
	Streb.Contig03117G000020.1	TTM2	Inorganic pyrophosphatase TTM2 OS=Arabidopsis	2.30021	0.0164014	OE
	Streb.1G031730.1	C7AV8	Cytochrome P450 71AV8 OS=Cichorium	1.72084	0.00017266	OE
	Streb.4G009580.1	PUB44	U-box domain-containing protein 44	1.3509	3.21484e-07	OE
	Streb.10G010640.1	N/A	N/A	1.76375	4.70514e-05	OE
	Streb.1G017040.1	ODBA2	2-oxoisovalerate dehydrogenase subunit alpha	2.59082	1.34556e-05	OE
	Streb.1G048080.1	ICMTB	Protein-S-isoprenylcysteine O-methyltransferase B OS=Arabidopsis	1.61256	0.00773354	OE
	Streb.4G012110.1	N/A	N/A	1.2068	2.81706e-05	OE
	Streb.10G002480.1	CCA31	Putative cyclin-A3-1 OS=Arabidopsis thaliana	3.61331	0.0100895	OE
	Streb.5G005790.1	PT106	Probable sugar phosphate/phosphate translocator	1.602	3.48895e-05	OE
	Streb.1G019800.1	N/A	N/A	7.78495	4.06031e-06	OE
	Streb.5G013310.1	N/A	N/A	3.20556	0.00487514	OE
	Streb.5G032820.1	OFP8	Transcription repressor OFP8 OS=Arabidopsis	1.40174	0.0338691	OE
	Streb.1G046970.1	RL5	60S ribosomal protein L5	3.24711	0.00410435	OE
	Streb.11G025970.1	NILP3	Omega-amidase, chloroplastic OS=Arabidopsis thaliana	2.25259	8.20401e-05	OE
	Streb.7G025700.1	P5CS	Delta-1-pyrroline-5-carboxylate synthase OS=Actinidia deliciosa	1.60838	6.30665e-06	OE
	Streb.6G020080.1	N/A	N/A	1.12281	0.000193544	OE
	Streb.8G009450.1	KIN17	KIN17-like protein OS=Arabidopsis thaliana	1.81725	2.84258e-06	OE
	Streb.2G010670.1	N/A	N/A	2.23083	0.000191143	OE
	Streb.2G052230.1	DSLE	Zinc finger BED domain-containing	10.1511	1.16729e-49	OE
	Streb.10G010710.1	UGT85C1	UDP-glycosyltransferase 85C1 OS=Stevia rebaudiana	1.23826	0.000115665	OE
	Streb.5G019500.1	EF1A	Elongation factor 1-alpha OS=Solanum	1.32656	2.78421e-08	OE
	Streb.2G013600.1	LOL1	Protein LOL1 OS=Arabidopsis thaliana	1.87363	0.0319948	OE
	Streb.3G007460.1	ARAE1	UDP-arabinose 4-epimerase 1 OS=Arabidopsis	2.08673	0.00587625	OE
	Streb.8G000650.1	HMGB1	High mobility group B	9.50528	0	OE
	Streb.Contig00918G000020.1	IQD2	Protein IQ-DOMAIN 2 OS=Arabidopsis	2.86716	0.00306991	OE
	Streb.Contig02530G000050.1	CDPK8	Calcium-dependent protein kinase 8	3.78436	4.51466e-16	OE
	Streb.8G006650.1	N/A	N/A	3.37944	0.000368355	OE
	Streb.6G033840.1	N/A	N/A	5.53164	0.00228596	OE
	Streb.7G023380.1	CET1	CEN-like protein 1 OS=Nicotiana	3.25851	0.0109245	OE
	Streb.2G001280.1	PSD10	26S proteasome non-ATPase regulatory	1.55491	0.0114654	OE
	Streb.1G019110.1	N/A	N/A	3.29692	0.0177945	OE
	Streb.7G005320.1	SC11C	Signal peptidase complex catalytic	2.05208	0.0118784	OE
	Streb.8G034480.1	DET2	Steroid 5-alpha-reductase DET2 OS=Arabidopsis	1.75664	1.27242e-05	OE
	Streb.Contig05313G000010.1	DTX16	Protein DETOXIFICATION 16 OS=Arabidopsis	1.82733	1.00033e-10	OE
	Streb.1G050150.1	ZOG	Zeatin O-glucosyltransferase OS=Phaseolus lunatus	9.89217	5.6117e-160	OE
	Streb.Contig03266G000010.1	COL9	Zinc finger protein CONSTANS-LIKE	2.66553	1.26222e-06	OE
	Streb.8G010400.1	N/A	N/A	1.59199	6.88594e-07	OE
	Streb.11G016360.1	LHT1	Lysine histidine transporter 1	1.9521	1.54195e-09	OE
	Streb.5G031260.1	DCL4	Dicer-like protein 4 OS=Arabidopsis	1.63109	4.09444e-08	OE
	Streb.6G022480.1	LCAT2	Phospholipid--sterol O-acyltransferase OS=Arabidopsis thaliana	1.63098	0.0159929	OE
	Streb.7G008260.1	Y5597	Probable receptor-like protein kinase	1.49186	4.33101e-05	OE
	Streb.10G022610.1	N/A	N/A	2.21196	6.10739e-06	OE
	Streb.10G000060.1	CNGC1	Cyclic nucleotide-gated ion channel	1.95949	4.96387e-08	OE
	Streb.2G037280.1	C7A29	Cytochrome P450 CYP72A219 OS=Panax	1.91196	0.00238883	OE
	Streb.5G027570.1	SFH8	Phosphatidylinositol/phosphatidylcholine transfer protein SFH8	1.42585	1.20253e-20	OE
	Streb.1G020320.1	S35F1	Solute carrier family 35	13.0568	3.96736e-56	OE
	Streb.11G009260.1	HMR2B	3-hydroxy-3-methylglutaryl coenzyme A reductase	4.04357	5.24642e-10	OE
	Streb.1G037120.1	IMPA1	Importin subunit alpha-1 OS=Arabidopsis	1.21846	1.22467e-06	OE
	Streb.8G007240.1	YI31B	Transposon Ty3-I Gag-Pol polyprotein	1.87873	0.0205336	OE
	Streb.3G010390.1	GDIR	Rho GDP-dissociation inhibitor 1	1.427	0.00790206	OE
	Streb.4G025940.1	BOR4	Boron transporter 4 OS=Arabidopsis	1.41082	0.0122137	OE
	Streb.1G023910.1	MEMO1	Protein MEMO1 OS=Xenopus laevis	1.34576	4.11968e-05	OE
	Streb.8G028430.1	MPPB	Probable mitochondrial-processing peptidase subunit	12.1258	3.75019e-101	OE
	Streb.2G011260.1	N/A	N/A	2.36159	0.00253951	OE
	Streb.5G027130.1	N/A	N/A	6.79407	0.00413276	OE
	Streb.6G015380.1	GDU3	Protein GLUTAMINE DUMPER 3	2.09769	0.00165745	OE
	Streb.8G022350.1	N/A	N/A	1.62339	1.0273e-11	OE
	Streb.5G024810.1	RM41B	39S ribosomal protein L41-B,	3.23365	6.63499e-06	OE
	Streb.8G026140.1	TMVRN	TMV resistance protein N	2.76921	4.92888e-09	OE
	Streb.10G018930.1	N/A	N/A	6.07276	0.0025526	OE
	Streb.6G000140.1	MSL2	Mechanosensitive ion channel protein	2.59339	1.00682e-11	OE
	Streb.2G041610.1	N/A	N/A	2.76946	0.0141265	OE
	Streb.11G026330.1	HPT1	Homogentisate phytyltransferase 1, chloroplastic	1.54974	1.22193e-06	OE
	Streb.8G016500.1	CDC5L	Cell division cycle 5-like	3.3109	0.00230356	OE
	Streb.9G002650.1	NUP62	Nuclear pore complex protein	1.56165	0.000412748	OE
	Streb.2G021280.1	N/A	N/A	3.77699	0.000222917	OE
	Streb.Contig05897_ERROPOS2000000G000170.1	E1314	Glucan endo-1,3-beta-glucosidase 14 OS=Arabidopsis	2.35394	4.0997e-05	OE
	Streb.5G003530.1	KIRO	Kirola OS=Actinidia deliciosa OX=3627	5.47175	0.0081476	OE
	Streb.11G027570.1	HST	Shikimate O-hydroxycinnamoyltransferase OS=Nicotiana tabacum	1.36703	0.000792684	OE
	Streb.8G031160.1	C7A12	Cytochrome P450 CYP736A12 OS=Panax	3.49063	8.71111e-10	OE
	Streb.10G014050.1	SFR2	Galactolipid galactosyltransferase SFR2, chloroplastic	2.31583	0.0313044	OE
	Streb.2G056530.1	N/A	N/A	1.70927	0.0015114	OE
	Streb.1G023160.1	TRA1	Putative AC transposase OS=Zea	1.97683	0.000213805	OE
	Streb.6G023690.1	PPR15	Pentatricopeptide repeat-containing protein At1g06143	2.51533	0.000603771	OE
	Streb.1G012700.1	CRK2	Cysteine-rich receptor-like protein kinase	2.46067	2.76691e-12	OE
	Streb.3G006470.1	N/A	N/A	3.11076	0.000215483	OE
	Streb.6G029280.1	FLS2	LRR receptor-like serine/threonine-protein kinase	1.54768	0.000644317	OE
	Streb.5G005950.1	TBB1	Tubulin beta-1 chain OS=Zea	2.20341	1.24483e-07	OE
	Streb.2G014410.1	N/A	N/A	11.7219	1.63464e-22	OE
	Streb.Contig02338G000030.1	N/A	N/A	2.66676	0.00805794	OE
	Streb.1G039380.1	LACS1	Long chain acyl-CoA synthetase	1.23008	0.00163725	OE
	Streb.6G033570.1	STC	Sugar carrier protein C	1.94045	0.0064627	OE
	Streb.2G036440.1	LYK3	LysM domain receptor-like kinase	1.28005	3.27637e-06	OE
	Streb.5G006650.1	PP168	Pentatricopeptide repeat-containing protein At2g22070	2.7295	0.0232433	OE
	Streb.3G005270.1	C76B1	7-ethoxycoumarin O-deethylase OS=Helianthus tuberosus	2.27302	0.00845863	OE
	Streb.11G021130.1	N/A	N/A	1.76727	1.48935e-16	OE
	Streb.6G026640.1	FEN1	Flap endonuclease 1 OS=Arabidopsis	2.61186	4.48914e-88	OE
	Streb.1G020600.1	LAZH1	Protein LAZ1 homolog 1	6.53481	4.46368e-06	OE
	Streb.6G006240.1	N/A	N/A	1.61804	0.000149368	OE
	Streb.8G017270.1	N/A	N/A	2.57788	0.006048	OE
	Streb.11G024090.1	PMEU1	Pectinesterase/pectinesterase inhibitor U1 OS=Solanum	2.57783	0.000646046	OE
	Streb.9G021530.1	N/A	N/A	1.66975	0.00193315	OE
	Streb.9G006310.1	AHK5	Histidine kinase 5 OS=Arabidopsis	2.35079	0.00405706	OE
	Streb.8G006790.1	N/A	N/A	5.69006	7.00086e-05	OE
	Streb.1G023280.1	AKRC9	NADPH-dependent aldo-keto reductase, chloroplastic	2.37301	2.3849e-10	OE
	Streb.9G000050.1	N/A	N/A	1.31209	3.29261e-12	OE
	Streb.11G018430.1	BH094	Transcription factor BHLH094 OS=Oryza	1.56972	0.0175906	OE
	Streb.6G031480.1	UTR4	UDP-galactose/UDP-glucose transporter 4 OS=Arabidopsis	1.32642	0.00750686	OE
	Streb.2G010770.1	N/A	N/A	2.52327	0.000405011	OE
	Streb.9G018050.1	SCP18	Serine carboxypeptidase-like 18 OS=Arabidopsis	7.24556	1.89251e-07	OE
	Streb.7G007750.1	SAB	Protein SABRE OS=Arabidopsis thaliana	1.56084	0.0127177	OE
	Streb.6G000370.1	FAAH	Fatty acid amide hydrolase	1.20531	0.0183994	OE
	Streb.5G009910.1	N/A	N/A	4.65668	0.0103332	OE
	Streb.2G052310.1	N/A	N/A	6.45227	0.00155164	OE
	Streb.2G022420.1	DA1	Protein DA1 OS=Arabidopsis thaliana	3.61631	0.00261676	OE
	Streb.1G020090.1	SRF8	Protein STRUBBELIG-RECEPTOR FAMILY 8	3.3289	0.000118663	OE
	Streb.10G006300.1	POL3	Retrovirus-related Pol polyprotein from	3.1646	0.0213975	OE
	Streb.5G029250.1	NHL13	NDR1/HIN1-like protein 13 OS=Arabidopsis	1.5505	0.0245755	OE
	Streb.3G023500.1	N/A	N/A	1.28232	0.00135316	OE
	Streb.1G051070.1	HBPL1	Heme-binding-like protein At3g10130, chloroplastic	2.38796	7.41947e-12	OE
	Streb.2G002290.1	N/A	N/A	2.70099	1.51311e-05	OE
	Streb.6G027040.1	FB250	F-box protein At5g03100 OS=Arabidopsis	1.63789	2.12936e-07	OE
	Streb.11G026580.1	WRK11	Probable WRKY transcription factor	2.07774	0.000143637	OE
	Streb.9G023000.1	N/A	N/A	4.22933	0.0126365	OE
	Streb.Contig05455G000010.1	RR21	30S ribosomal protein S21,	9.02507	4.77706e-40	OE
	Streb.Contig05028G000020.1	FQRL2	Probable NAD(P)H dehydrogenase (quinone)	1.5531	2.22026e-05	OE
	Streb.9G024420.1	NLP1	Protein NLP1 OS=Arabidopsis thaliana	1.82592	0.00207459	OE
	Streb.2G003730.1	C3H19	Zinc finger CCCH domain-containing	5.25274	0.000139084	OE
	Streb.7G001770.1	FAR1	Protein FAR-RED IMPAIRED RESPONSE	1.33973	2.2325e-06	OE
	Streb.10G007300.1	PSE1	Protein LEAD-SENSITIVE 1 OS=Arabidopsis	1.64612	0.00488797	OE
	Streb.7G015490.1	N/A	N/A	3.17423	0.00392509	OE
	Streb.Contig04799G000010.1	P4KG7	Phosphatidylinositol 4-kinase gamma 7	1.84913	0.000603457	OE
	Streb.1G049770.1	N/A	N/A	2.03694	0.00118354	OE
	Streb.8G003440.1	YUC10	Probable indole-3-pyruvate monooxygenase YUCCA10	1.67375	2.88099e-08	OE
	Streb.5G033640.1	Y5900	Putative receptor-like protein kinase	1.15692	9.40148e-09	OE
	Streb.2G022080.1	MPK7	Mitogen-activated protein kinase 7	1.10167	3.09427e-05	OE
	Streb.6G013540.1	PERK1	Proline-rich receptor-like protein kinase	1.62677	3.69656e-06	OE
	Streb.9G024280.1	N/A	N/A	3.62215	0.000111252	OE
	Streb.2G052420.1	LYPA2	Acyl-protein thioesterase 2 OS=Homo	2.68244	0.0155164	OE
	Streb.9G010210.1	Y2245	Uncharacterized TPR repeat-containing protein	7.87525	1.95932e-11	OE
	Streb.4G014380.1	N/A	N/A	1.66351	0.00331434	OE
	Streb.1G046910.1	MLO1	MLO-like protein 1 OS=Arabidopsis	1.43641	4.47344e-06	OE
	Streb.1G018640.1	ILK1	Integrin-linked protein kinase 1	4.19897	2.0585e-21	OE
	Streb.1G036040.1	N/A	N/A	2.50062	1.0845e-05	OE
	Streb.Contig04035G000010.1	N/A	N/A	2.85793	1.5981e-05	OE
	Streb.1G031720.1	C7AV8	Cytochrome P450 71AV8 OS=Cichorium	1.77954	2.04353e-06	OE
	Streb.7G020910.1	OOPDA	Organellar oligopeptidase A, chloroplastic/mitochondrial	2.60089	0.00374992	OE
	Streb.7G019180.1	N/A	N/A	2.04078	0.00915887	OE
	Streb.10G010920.1	N/A	N/A	1.73536	1.87317e-05	OE
	Streb.3G026830.1	APRR7	Two-component response regulator-like APRR7	1.38621	3.06676e-16	OE
	Streb.4G011620.1	GALS3	Galactan beta-1,4-galactosyltransferase GALS3 OS=Arabidopsis	2.04842	0.00948749	OE
	Streb.7G020900.1	POLC7	Polcalcin Phl p 7	5.34317	0.00580369	OE
	Streb.5G002390.1	APC2	Anaphase-promoting complex subunit 2	1.69017	1.20314e-09	OE
	Streb.9G015090.1	CRK26	Cysteine-rich receptor-like protein kinase	2.21605	4.12568e-12	OE
	Streb.9G002080.1	KAT1	Kynurenine--oxoglutarate transaminase 1 OS=Homo	1.89351	0.000495223	OE
	Streb.1G015080.1	CAR4	Protein C2-DOMAIN ABA-RELATED 4	8.69898	5.32315e-17	OE
	Streb.5G008760.1	ASO	L-ascorbate oxidase OS=Nicotiana tabacum	1.35891	0.000802848	OE
	Streb.Contig04545G000030.1	DET1	Light-mediated development protein DET1	3.4704	2.08998e-29	OE
	Streb.4G013930.1	PP184	Pentatricopeptide repeat-containing protein At2g34400	1.17367	0.00011002	OE
	Streb.1G019220.1	GDI2	Guanosine nucleotide diphosphate dissociation	12.747	7.32964e-232	OE
	Streb.Contig02905G000080.1	YSL1	Metal-nicotianamine transporter YSL1 OS=Arabidopsis	1.65196	1.19053e-09	OE
	Streb.Contig01088G000010.1	YE7A	Putative lipase C4A8.10 OS=Schizosaccharomyces	4.64303	0.000277535	OE
	Streb.Contig00691G000010.1	CNOT3	CCR4-NOT transcription complex subunit	1.38523	2.56866e-11	OE
	Streb.5G014710.1	N/A	N/A	6.21896	0.00013481	OE
	Streb.5G000360.1	ILL4	IAA-amino acid hydrolase ILR1-like	2.33782	3.41407e-07	OE
	Streb.1G011090.1	CSI1	Protein CELLULOSE SYNTHASE INTERACTIVE	1.68749	6.49238e-07	OE
	Streb.6G024940.1	N/A	N/A	2.20197	0.0324116	OE
	Streb.5G014700.1	MOS2	Protein MOS2 OS=Arabidopsis thaliana	3.27874	2.02632e-68	OE
	Streb.3G011210.1	LSH10	Protein LIGHT-DEPENDENT SHORT HYPOCOTYLS	2.86704	0.00195536	OE
	Streb.1G018690.1	SUN4	SUN domain-containing protein 4	3.85941	0.0142667	OE
	Streb.8G003050.1	N/A	N/A	1.7303	0.00737574	OE
	Streb.11G014920.1	N/A	N/A	2.24359	2.62026e-06	OE
	Streb.1G020020.1	BH062	Transcription factor bHLH62 OS=Arabidopsis	3.14178	1.54491e-17	OE
	Streb.8G022340.1	APRR7	Two-component response regulator-like APRR7	1.74186	2.35117e-11	OE
	Streb.2G022580.1	UGT83A1	UDP-glycosyltransferase 83A1 OS=Arabidopsis thaliana	4.21408	0.00507846	OE
	Streb.1G026330.1	N/A	N/A	3.8418	4.07275e-05	OE
	Streb.5G011720.1	N/A	N/A	2.82435	1.42703e-11	OE
	Streb.10G010980.1	MD15A	Mediator of RNA polymerase	1.91457	3.12909e-05	OE
	Streb.7G017940.1	LCAT3	Phospholipase A(1) LCAT3 OS=Arabidopsis	1.56384	3.95915e-06	OE
	Streb.1G032940.1	APS2L	Inactive glucose-1-phosphate adenylyltransferase small	2.69407	0.00091902	OE
	Streb.5G016900.1	PCRK1	Serine/threonine-protein kinase PCRK1 OS=Arabidopsis	1.54798	0.0101449	OE
	Streb.1G034360.1	HERK	Receptor-like protein kinase HERK	1.80462	3.74289e-07	OE
	Streb.8G025930.1	N/A	N/A	6.70545	5.15083e-06	OE
	Streb.7G029020.1	PIGV	GPI mannosyltransferase 2 OS=Homo	1.72052	1.64228e-08	OE
	Streb.5G019770.1	LOX2	Lipoxygenase 2, chloroplastic OS=Tanacetum	1.52011	0.00397967	OE
	Streb.9G025030.1	SKP1A	SKP1-like protein 1A OS=Arabidopsis	1.98733	0.000209569	OE
	Streb.10G019650.1	N/A	N/A	1.93958	0.0169522	OE
	Streb.3G008860.1	N/A	N/A	1.48128	0.00789263	OE
	Streb.6G001080.1	POL3	Retrovirus-related Pol polyprotein from	2.89942	0.0239704	OE
	Streb.8G024220.1	SPDS1	Spermidine synthase 1 OS=Pisum	1.30986	0.000642403	OE
	Streb.3G026580.1	ARGJ	Arginine biosynthesis bifunctional protein	1.90971	1.96368e-18	OE
	Streb.7G024920.1	ERD15	Protein EARLY RESPONSIVE TO	2.17857	0.000256536	OE
	Streb.Contig03987G000020.1	TPC12	Trafficking protein particle complex	1.24907	0.000584983	OE
	Streb.11G019150.1	SOSSB	SOSS complex subunit B	6.96766	1.08157e-05	OE
	Streb.2G056130.1	PP336	Pentatricopeptide repeat-containing protein At4g22760	1.21054	0.0299577	OE
	Streb.9G001710.1	PPR21	Pentatricopeptide repeat-containing protein At1g08070,	1.53026	0.00953154	OE
	Streb.2G010110.1	NLP7	Protein NLP7 OS=Arabidopsis thaliana	2.53695	0.00561741	OE
	Streb.10G001130.1	NFP	Serine/threonine receptor-like kinase NFP	1.41572	0.000165652	OE
	Streb.10G027110.1	N/A	N/A	1.66193	0.0010067	OE
	Streb.1G048190.1	COPT6	Copper transporter 6 OS=Arabidopsis	3.46669	1.60449e-18	OE
	Streb.11G016710.1	SUVH4	Histone-lysine N-methyltransferase, H3 lysine-9	1.67404	0.00367168	OE
	Streb.6G032380.1	N/A	N/A	1.62614	0.00132304	OE
	Streb.4G000170.1	RL5	60S ribosomal protein L5	1.83622	1.39394e-09	OE
	Streb.2G040450.1	MTP10	Metal tolerance protein 10	1.47096	0.000863009	OE
	Streb.2G017900.1	APT1	Adenine phosphoribosyltransferase 1 OS=Triticum	1.71656	0.0033342	OE
	Streb.Contig04584G000030.1	FB136	F-box protein At3g08750 OS=Arabidopsis	1.34842	3.62142e-05	OE
	Streb.1G051040.1	LRK59	L-type lectin-domain containing receptor	1.88757	0.00323703	OE
	Streb.8G009370.1	HSP7C	Heat shock cognate 70	10.122	1.34269e-91	OE
	Streb.6G027140.1	FB50	Putative F-box protein At1g49610	2.62311	0.000103914	OE
	Streb.9G031900.1	POL3	Retrovirus-related Pol polyprotein from	4.10638	0.00702909	OE
	Streb.Contig04043G000020.1	N/A	N/A	5.27913	0.0080706	OE
	Streb.6G028960.1	N/A	N/A	8.58626	8.09119e-07	OE
	Streb.10G029260.1	N/A	N/A	5.03964	0.015653	OE
	Streb.6G021360.1	RAA5B	Ras-related protein RABA5b OS=Arabidopsis	1.43567	0.000136969	OE
	Streb.5G023790.1	N/A	N/A	1.71951	0.0190232	OE
	Streb.1G038880.1	HSP7C	Heat shock cognate 70	4.4862	2.29185e-13	OE
	Streb.7G008370.1	PBL9	Probable serine/threonine-protein kinase PBL9	2.3471	4.29205e-08	OE
	Streb.1G014420.1	N/A	N/A	4.86475	0.0399697	OE
	Streb.Contig03620G000030.1	N/A	N/A	2.46156	2.55366e-13	OE
	Streb.Contig03451G000010.1	SUT31	Sulfate transporter 3.1 OS=Arabidopsis	3.5429	0.00402316	OE
	Streb.8G033760.1	TMVRN	TMV resistance protein N	1.39162	0.00257957	OE
	Streb.10G013580.1	GFS12	Protein GFS12 OS=Arabidopsis thaliana	1.19688	0.0191276	OE
	Streb.8G014960.1	TGA4	Transcription factor TGA4 OS=Arabidopsis	1.18675	0.00201223	OE
	Streb.Contig03518G000020.1	FEN1	Flap endonuclease 1 OS=Arabidopsis	2.55593	5.53026e-59	OE
	Streb.8G012380.1	RMR41	Remorin 4.1 OS=Arabidopsis thaliana	1.74299	3.51904e-06	OE
	Streb.2G050170.1	TORL4	TORTIFOLIA1-like protein 4 OS=Arabidopsis	2.92956	2.48035e-06	OE
	Streb.8G029280.1	QSOX2	Sulfhydryl oxidase 2 OS=Arabidopsis	1.39343	0.0169059	OE
	Streb.10G015480.1	N/A	N/A	1.30521	9.40887e-13	OE
	Streb.9G018890.1	HSP7Q	Heat shock 70 kDa	3.10659	0.0104336	OE
	Streb.1G019660.1	AB29B	ABC transporter B family	3.24298	0.000116092	OE
	Streb.1G031450.1	PUP3	Purine permease 3 OS=Arabidopsis	13.2328	3.45347e-112	OE
	Streb.7G025590.1	UGT76G1	UDP-glycosyltransferase 76G1 OS=Stevia rebaudiana	1.36507	4.46199e-06	OE
	Streb.2G024350.1	COMT1	Caffeic acid 3-O-methyltransferase (Fragment)	4.50157	4.44128e-05	OE
	Streb.8G031810.1	WAK2	Wall-associated receptor kinase 2	4.83853	1.82537e-08	OE
	Streb.8G025940.1	N/A	N/A	6.34169	0.000357212	OE
	Streb.7G028360.1	RS23	40S ribosomal protein S23	9.51508	2.30138e-37	OE
	Streb.8G005120.1	SUT31	Sulfate transporter 3.1 OS=Arabidopsis	3.58502	0.00829367	OE
	Streb.5G016050.1	U082	Probable transcriptional regulatory protein	1.36419	9.9422e-05	OE
	Streb.7G025220.1	NFXL2	NF-X1-type zinc finger protein	1.09521	0.00953611	OE
	Streb.1G037450.1	CCL3	Acetate--CoA ligase CCL3 OS=Humulus	2.5998	1.03114e-30	OE
	Streb.2G009630.1	N/A	N/A	4.40721	0.000577097	OE
	Streb.5G014690.1	SKL2	Probable inactive shikimate kinase	3.34771	4.66373e-20	OE
	Streb.3G008240.1	N/A	N/A	5.55464	0.00486092	OE
	Streb.5G003700.1	N/A	N/A	3.09019	0.0103959	OE
	Streb.9G001190.1	TRE	Probable trehalase OS=Oryza sativa	1.97913	2.39293e-06	OE
	Streb.6G018130.1	N/A	N/A	2.36968	0.0146932	OE
	Streb.10G007120.1	BIP5	Luminal-binding protein 5 OS=Nicotiana	1.43044	0.00339889	OE
	Streb.1G029260.1	PFD2	Probable prefoldin subunit 2	2.25493	8.69188e-12	OE
	Streb.10G030740.1	APX6	Putative L-ascorbate peroxidase 6	2.03951	0.00131052	OE
	Streb.Contig03602G000010.1	HSR4	Protein HYPER-SENSITIVITY-RELATED 4 OS=Arabidopsis	6.43451	0.00390538	OE
	Streb.6G014660.1	TWIH	Twinkle homolog protein, chloroplastic/mitochondrial	1.27321	1.60283e-12	OE
	Streb.11G030550.1	POLX	Retrovirus-related Pol polyprotein from	6.458	0.00116622	OE
	Streb.1G027690.1	N/A	N/A	8.76822	3.19107e-08	OE
	Streb.8G027760.1	N/A	N/A	5.55354	0.00410609	OE
	Streb.11G024740.1	N/A	N/A	2.84155	2.12699e-05	OE
	Streb.7G018100.1	AGT21	Alanine--glyoxylate aminotransferase 2 homolog	1.28104	0.000471233	OE
	Streb.1G037540.1	LFS	Lachrymatory-factor synthase OS=Allium cepa	5.72541	0.00140266	OE
	Streb.2G014390.1	N/A	N/A	2.65173	2.6148e-21	OE
	Streb.9G023710.1	BRM	ATP-dependent helicase BRM OS=Arabidopsis	2.62254	0.0176751	OE
	Streb.2G036180.1	DNJ10	Chaperone protein dnaJ 10	2.60404	2.59019e-08	OE
	Streb.10G031420.1	OP162	Outer envelope pore protein	5.35943	0.000258596	OE
	Streb.4G012220.1	N/A	N/A	4.57425	7.93449e-32	OE
	Streb.1G010400.1	WAKLI	Wall-associated receptor kinase-like 22	1.57853	6.44428e-07	OE
	Streb.Contig04043G000030.1	N/A	N/A	6.82463	5.41196e-06	OE
	Streb.9G016020.1	R18AL	60S ribosomal protein L18a-like	1.22092	3.02811e-06	OE
	Streb.1G016390.1	N/A	N/A	6.42199	9.17206e-05	OE
	Streb.Contig04578G000030.1	DCAM	S-adenosylmethionine decarboxylase proenzyme OS=Helianthus	3.57391	1.85679e-10	OE
	Streb.7G015920.1	N/A	N/A	2.18336	9.7717e-06	OE
	Streb.6G014730.1	N/A	N/A	1.21653	5.52528e-13	OE
	Streb.7G026940.1	HBL2	Non-symbiotic hemoglobin 2 OS=Arabidopsis	4.03998	3.10002e-16	OE
	Streb.Contig04744G000050.1	CAF1M	CRS2-associated factor 1, mitochondrial	1.9792	9.45318e-12	OE
	Streb.2G014580.1	N/A	N/A	2.30784	0.00108846	OE
	Streb.3G028400.1	RS25	40S ribosomal protein S25	9.4947	1.61065e-83	OE
	Streb.10G021830.1	ADH1	Alcohol dehydrogenase 1 OS=Solanum	1.4961	0.0032894	OE
	Streb.1G044100.1	MIRO2	Mitochondrial Rho GTPase 2	1.56489	9.63243e-05	OE
	Streb.9G000900.1	RBOHF	Respiratory burst oxidase homolog	1.09681	6.14788e-05	OE
	Streb.7G015970.1	NAA40	N-alpha-acetyltransferase 40 OS=Danio rerio	2.28251	0.00010435	OE
	Streb.2G028110.1	AASS	Alpha-aminoadipic semialdehyde synthase OS=Arabidopsis	2.67942	0.0174104	OE
	Streb.2G010640.1	N/A	N/A	3.47593	0.000316002	OE
	Streb.3G001620.1	LIN1	LINE-1 reverse transcriptase homolog	2.1843	0.00857878	OE
	Streb.8G018470.1	PPR15	Pentatricopeptide repeat-containing protein At1g06143	1.40402	8.36005e-09	OE
	Streb.5G027470.1	POLX	Retrovirus-related Pol polyprotein from	6.84417	5.76977e-06	OE
	Streb.5G021680.1	N/A	N/A	1.71531	0.0132156	OE
	Streb.6G027700.1	REM41	Remorin 4.1 OS=Oryza sativa	3.00412	0.00350921	OE
	Streb.6G031780.1	RS13	40S ribosomal protein S13	1.42466	0.0189448	OE
	Streb.11G014990.1	DCAM	S-adenosylmethionine decarboxylase proenzyme OS=Helianthus	1.92353	2.05277e-06	OE
	Streb.2G019770.1	N/A	N/A	2.63934	0.000313325	OE
	Streb.8G019070.1	ERF5	Ethylene-responsive transcription factor 5	1.55151	0.0173532	OE
	Streb.Contig05306G000030.1	SYT3	Synaptotagmin-3 OS=Arabidopsis thaliana OX=3702	2.71669	0.0161819	OE
	Streb.Contig04372G000010.1	RK35	50S ribosomal protein L35,	2.35293	9.22399e-12	OE
	Streb.11G031910.1	METL6	tRNA N(3)-methylcytidine methyltransferase METTL6	7.54081	1.67782e-14	OE
	Streb.5G028830.1	NOC2L	Nucleolar complex protein 2	1.26329	7.76836e-23	OE
	Streb.10G015420.1	TARB1	Probable methyltransferase TARBP1 OS=Homo	1.32431	0.000152315	OE
	Streb.8G012500.1	IDE1	Insulin-degrading enzyme-like 1, peroxisomal	1.60322	0.000865267	OE
	Streb.11G029090.1	PAF1	Protein PAF1 homolog OS=Arabidopsis	1.19003	0.00351182	OE
	Streb.4G006130.1	MCA4	Metacaspase-4 OS=Arabidopsis thaliana OX=3702	1.54333	2.44623e-07	OE
	Streb.Contig05897_ERROPOS1300000G000050.1	PCP	Lysosomal Pro-X carboxypeptidase OS=Mus	1.94618	0.00256926	OE
	Streb.2G060800.1	PHBP	Phytohormone-binding protein OS=Medicago truncatula	3.72469	3.62365e-05	OE
	Streb.6G000620.1	N/A	N/A	2.6652	0.0193408	OE
	Streb.1G017380.1	EIF3B	Eukaryotic translation initiation factor	1.61136	2.42737e-13	OE
	Streb.4G012120.1	N/A	N/A	1.58213	6.02956e-05	OE
	Streb.10G029520.1	Y14	RNA-binding protein Y14 OS=Arabidopsis	11.3449	2.01888e-105	OE
	Streb.6G012100.1	PTR29	Protein NRT1/ PTR FAMILY	1.98179	1.23559e-06	OE
	Streb.Contig02530G000040.1	RFS2	Probable galactinol--sucrose galactosyltransferase 2	5.64738	0.00142192	OE
	Streb.11G014900.1	N/A	N/A	4.89214	0.00148031	OE
	Streb.10G015750.1	N/A	N/A	5.52729	0.00847052	OE
	Streb.8G005140.1	SUT31	Sulfate transporter 3.1 OS=Arabidopsis	3.61153	0.0173192	OE
	Streb.11G019110.1	CDPK4	Calcium-dependent protein kinase 4	1.74404	7.65804e-15	OE
	Streb.7G025290.1	Y3475	Probable LRR receptor-like serine/threonine-protein	7.19982	0.0134488	OE
	Streb.6G000220.1	ECD	Protein ecdysoneless homolog OS=Arabidopsis	2.65403	2.48783e-45	OE
	Streb.8G006800.1	UNI	Disease resistance protein UNI	4.03747	0.00161413	OE
	Streb.8G006830.1	DRL28	Probable disease resistance protein	1.4147	3.51674e-12	OE
	Streb.5G002570.1	CMTA4	Calmodulin-binding transcription activator 4	6.18418	1.41857e-05	OE
	Streb.2G024470.1	N/A	N/A	3.51852	0.00863167	OE
	Streb.1G019460.1	BAGP1	BAG-associated GRAM protein 1	12.0805	7.79202e-59	OE
	Streb.11G026560.1	Y1561	Probable LRR receptor-like serine/threonine-protein	3.24871	0.0193298	OE
	Streb.6G011080.1	AGT22	Alanine--glyoxylate aminotransferase 2 homolog	4.31977	0.00726376	OE
	Streb.1G002930.1	APC1	Anaphase-promoting complex subunit 1	1.91472	1.13202e-05	OE
	Streb.7G016970.1	HMG15	High mobility group B	1.93523	0.0178099	OE
	Streb.3G006310.1	LRK91	L-type lectin-domain containing receptor	8.58251	2.27612e-13	OE
	Streb.1G049920.1	RMR42	Remorin 4.2 OS=Arabidopsis thaliana	2.36614	1.29272e-06	OE
	Streb.1G009890.1	WAKLH	Wall-associated receptor kinase-like 9	1.90459	0.000209813	OE
	Streb.1G043840.1	VPYL	Protein VAPYRIN-LIKE OS=Medicago truncatula	4.48658	7.62428e-25	OE
	Streb.1G002010.1	N/A	N/A	1.73272	0.0175435	OE
	Streb.6G000260.1	Y3272	Kelch repeat-containing protein At3g27220	1.77727	0.00776791	OE
	Streb.1G035700.1	PABN3	Polyadenylate-binding protein 3 OS=Arabidopsis	1.35425	8.62779e-13	OE
	Streb.3G009310.1	HSF30	Heat shock factor protein	4.62793	0.0197302	OE
	Streb.7G022320.1	N/A	N/A	11.2163	5.84035e-51	OE
	Streb.6G015660.1	H4	Histone H4 OS=Flaveria trinervia	2.25397	0.00016618	OE
	Streb.1G019590.1	LETM1	Mitochondrial proton/calcium exchanger protein	1.94287	6.87764e-15	OE
	Streb.5G023920.1	LAZH1	Protein LAZ1 homolog 1	1.52322	1.12574e-06	OE
	Streb.1G042170.1	PHL7	Myb family transcription factor	4.17574	0.0101275	OE
	Streb.7G022240.1	PFD3	Probable prefoldin subunit 3	1.14052	0.0271801	OE
	Streb.6G022620.1	TRC	Serine/threonine-protein kinase tricornered OS=Drosophila	5.23028	1.24395e-06	OE
	Streb.1G047650.1	GILT	Gamma-interferon-responsive lysosomal thiol protein	2.42599	1.56421e-06	OE
	Streb.2G010870.1	EID1	Phytochrome A-associated F-box protein	1.88563	0.00145724	OE
	Streb.7G006720.1	PYRH	Uridylate kinase OS=Synechocystis sp.	2.46383	4.23361e-19	OE
	Streb.2G044380.1	PP278	Pentatricopeptide repeat-containing protein At3g51320	1.9355	7.18271e-05	OE
	Streb.7G014710.1	POLR2	Retrovirus-related Pol polyprotein from	1.22416	0.0222026	OE
	Streb.3G003530.1	TF211	Transposon Tf2-11 polyprotein OS=Schizosaccharomyces	3.4199	8.2608e-05	OE
	Streb.9G028880.1	C2D61	C2 domain-containing protein At1g53590	1.5333	0.000728118	OE
	Streb.11G021370.1	SC31B	Protein transport protein SEC31	1.64873	6.02035e-10	OE
	Streb.4G014930.1	SLD5	DNA replication complex GINS	2.99931	0.00147826	OE
	Streb.1G020400.1	SL30A	Serine/arginine-rich SC35-like splicing factor	3.27948	8.71501e-16	OE
	Streb.3G000190.1	CFXQ	Ribulose bisphosphate carboxylase/oxygenase activase,	1.54807	8.48498e-18	OE
	Streb.6G000210.1	N/A	N/A	2.79285	2.19977e-11	OE
	Streb.11G015100.1	YI31B	Transposon Ty3-I Gag-Pol polyprotein	1.22254	0.0145967	OE
	Streb.10G003920.1	N/A	N/A	3.96306	0.0283986	OE
	Streb.1G019370.1	PXG	Peroxygenase OS=Sesamum indicum OX=4182	6.7064	0.0214147	OE
	Streb.2G052730.1	CCL8	Probable CoA ligase CCL8	1.56395	5.14916e-09	OE
	Streb.5G017740.1	N/A	N/A	1.31717	0.00421407	OE
	Streb.10G021860.1	N/A	N/A	8.50633	0.000204483	OE
	Streb.1G034710.1	HERK	Receptor-like protein kinase HERK	4.06747	1.46353e-16	OE
	Streb.6G020520.1	RAD51	DNA repair protein RAD51	6.42073	0.00431379	OE
	Streb.5G013960.1	TPX2	Protein TPX2 OS=Arabidopsis thaliana	3.0271	1.14096e-07	OE
	Streb.9G001270.1	NOG1	Nucleolar GTP-binding protein 1	1.32956	9.10082e-10	OE
	Streb.5G004630.1	ALA9	Putative phospholipid-transporting ATPase 9	1.61767	0.000406989	OE
	Streb.9G006280.1	N/A	N/A	7.36756	0.000211309	OE
	Streb.3G007050.1	LRK91	L-type lectin-domain containing receptor	2.59136	3.81447e-09	OE
	Streb.7G021660.1	TC10A	3-dehydrosphinganine reductase TSC10A OS=Arabidopsis	1.54089	3.64912e-07	OE
	Streb.1G031420.1	N/A	N/A	3.2914	3.30071e-08	OE
	Streb.8G012860.1	AVT1A	Amino acid transporter AVT1A	2.8039	0.0209553	OE
	Streb.4G007350.1	CH101	1.00E+01 kDa chaperonin 1,	10.2562	3.01168e-30	OE
	Streb.6G024310.1	DHQSD	Bifunctional 3-dehydroquinate dehydratase/shikimate dehydrogenase,	1.86552	0.00434153	OE
	Streb.4G012430.1	N/A	N/A	1.7709	1.33817e-05	OE
	Streb.2G010880.1	N/A	N/A	1.61928	7.47169e-05	OE
	Streb.8G012160.1	N/A	N/A	10.4642	3.79373e-62	OE
	Streb.1G018920.1	ENDO4	Endonuclease 4 OS=Arabidopsis thaliana	1.81343	0.000692557	OE
	Streb.5G021410.1	RAD50	DNA repair protein RAD50	2.64764	1.48034e-22	OE
	Streb.2G024690.1	CRK2	Cysteine-rich receptor-like protein kinase	8.9952	0.000154934	OE
	Streb.Contig04990G000010.1	BH048	Transcription factor bHLH48 OS=Arabidopsis	12.2863	8.17056e-266	OE
	Streb.4G025880.1	POL3	Retrovirus-related Pol polyprotein from	2.26875	0.0250317	OE
	Streb.9G025890.1	N/A	N/A	1.37338	0.00306803	OE
	Streb.9G010220.1	FTIP3	FT-interacting protein 3 OS=Arabidopsis	10.6931	8.24842e-12	OE
	Streb.9G010810.1	N/A	N/A	1.59347	4.37503e-08	OE
	Streb.7G022980.1	N/A	N/A	1.59473	6.92908e-05	OE
	Streb.2G003050.1	FH8	Formin-like protein 8 OS=Arabidopsis	2.43123	0.00173797	OE
	Streb.3G029700.1	MTR	Tryptophan-specific transport protein OS=Pseudomonas	1.34609	7.07661e-05	OE
	Streb.9G002800.1	N/A	N/A	3.54695	0.00013225	OE
	Streb.9G026900.1	RPB2	DNA-directed RNA polymerase II	4.04868	3.00733e-07	OE
	Streb.11G011300.1	NUD15	Nudix hydrolase 15, mitochondrial	1.34188	1.11324e-07	OE
	Streb.10G001930.1	TRF1B	TNF receptor-associated factor homolog	1.74355	0.000633039	OE
	Streb.6G025390.1	DI193	Protein DEHYDRATION-INDUCED 19 homolog	6.49965	0.0165542	OE
	Streb.10G000820.1	MOT1	Molybdate transporter 1 OS=Arabidopsis	1.71214	0.00150418	OE
	Streb.11G028930.1	N/A	N/A	1.80819	4.02149e-06	OE
	Streb.2G043290.1	BON3	Protein BONZAI 3 OS=Arabidopsis	1.61302	0.00986506	OE
	Streb.1G038810.1	RS4	40S ribosomal protein S4	5.84604	0.00286791	OE
	Streb.6G024100.1	N/A	N/A	3.02988	0.000783054	OE
	Streb.6G027520.1	SBT56	Subtilisin-like protease SBT5.6 OS=Arabidopsis	2.38945	0.0242994	OE
	Streb.1G020510.1	N/A	N/A	4.2003	3.5456e-07	OE
	Streb.6G013700.1	Y3136	Clavaminate synthase-like protein At3g21360	1.84642	0.016839	OE
	Streb.4G003470.1	N/A	N/A	1.91077	0.0006582	OE
	Streb.9G016630.1	DSP1	Tyrosine-protein phosphatase DSP1 OS=Arabidopsis	1.58558	0.00587651	OE
	Streb.2G013070.1	P2C55	Probable protein phosphatase 2C	2.10143	4.53281e-09	OE
	Streb.6G000130.1	ECD	Protein ecdysoneless homolog OS=Arabidopsis	1.91379	7.9283e-41	OE
	Streb.5G006130.1	N/A	N/A	1.2869	0.000606327	OE
	Streb.7G000450.1	GDL53	GDSL esterase/lipase At3g26430 OS=Arabidopsis	1.69913	0.0150132	OE
	Streb.5G002000.1	N/A	N/A	3.12543	0.00487395	OE
	Streb.9G011210.1	FBL15	F-box/LRR-repeat protein 15 OS=Arabidopsis	1.71017	9.87035e-05	OE
	Streb.9G027530.1	RK20	50S ribosomal protein L20,	3.0127	1.65239e-16	OE
	Streb.Contig05897_ERROPOS1300000G000060.1	N/A	N/A	1.28079	0.00132913	OE
	Streb.2G057300.1	NSF	Vesicle-fusing ATPase OS=Arabidopsis thaliana	5.39424	0.00950044	OE
	Streb.1G009540.1	N/A	N/A	2.45288	0.00049276	OE
	Streb.8G020720.1	YIPF1	Protein YIPF1 homolog OS=Dictyostelium	1.16275	0.000339963	OE
	Streb.6G001140.1	CXE7	Probable carboxylesterase 7 OS=Arabidopsis	2.30669	0.005952	OE
	Streb.6G017240.1	RHC2A	Probable E3 ubiquitin-protein ligase	6.86229	0.00276093	OE
	Streb.10G025370.1	LYK3	LysM domain receptor-like kinase	3.78909	1.10537e-19	OE
	Streb.6G021640.1	DNJ20	Chaperone protein dnaJ 20,	3.40142	0.00202416	OE
	Streb.2G024460.1	N/A	N/A	2.29498	0.00046923	OE
	Streb.3G025590.1	TI172	Mitochondrial import inner membrane	1.34885	2.02387e-08	OE
	Streb.3G007960.1	B120	G-type lectin S-receptor-like serine/threonine-protein	2.81249	0.00312495	OE
	Streb.6G024360.1	SPT20	Spermatogenesis-associated protein 20 OS=Homo	1.73139	0.0112621	OE
	Streb.8G027040.1	ROQ1	Disease resistance protein Roq1	2.07932	0.0203711	OE
	Streb.10G018880.1	PSD11	26S proteasome non-ATPase regulatory	2.06736	2.52841e-24	OE
	Streb.5G026050.1	RK18	50S ribosomal protein L18,	1.49417	0.00572134	OE
	Streb.9G027040.1	N/A	N/A	7.70852	2.32109e-17	OE
	Streb.7G025610.1	N/A	N/A	6.19285	0.00529585	OE
	Streb.Contig00579G000020.1	TMM50	Transmembrane protein 50 homolog	2.36108	4.20862e-24	OE
	Streb.Contig04006G000010.1	N/A	N/A	1.75018	0.0216927	OE
	Streb.2G036940.1	N/A	N/A	7.26919	9.39878e-08	OE
	Streb.2G014820.1	MY111	Transcription factor MYB111 OS=Arabidopsis	1.79622	0.0071471	OE
	Streb.2G029980.1	FAF3	Protein FANTASTIC FOUR 3	1.61597	0.022727	OE
	Streb.1G001910.1	N/A	N/A	2.98211	0.0017855	OE
	Streb.2G054100.1	Y3028	Uncharacterized acetyltransferase At3g50280 OS=Arabidopsis	1.28679	0.0195878	OE
	Streb.2G041570.1	T112B	Multifunctional methyltransferase subunit TRM112	7.81596	3.9422e-09	OE
	Streb.1G047550.1	GILT	Gamma-interferon-responsive lysosomal thiol protein	1.84184	7.83631e-10	OE
	Streb.7G002040.1	N/A	N/A	7.66527	5.13093e-05	OE
	Streb.Contig05228G000010.1	AAP6	Amino acid permease 6	1.88879	0.0128414	OE
	Streb.1G016760.1	MCA1	Metacaspase-1 OS=Arabidopsis thaliana OX=3702	3.02113	1.48639e-44	OE
	Streb.3G021510.1	N/A	N/A	4.26488	1.11019e-05	OE
	Streb.1G038940.1	TOL6	TOM1-like protein 6 OS=Arabidopsis	4.82635	0.00129099	OE
	Streb.1G020460.1	HD16N	Casein kinase 1-like protein	2.14623	3.53155e-36	OE
	Streb.2G033870.1	COG6	Conserved oligomeric Golgi complex	1.8894	4.47427e-05	OE
	Streb.3G021540.1	DHRS7	Dehydrogenase/reductase SDR family member	1.92975	0.0024553	OE
	Streb.10G019160.1	PUX10	Plant UBX domain-containing protein	1.36314	2.36995e-23	OE
	Streb.5G003420.1	CRR3	Probable NAD(P)H dehydrogenase subunit	1.49409	3.35167e-05	OE
	Streb.8G029720.1	LPP3	Putative lipid phosphate phosphatase	1.79368	0.000667339	OE
	Streb.11G001990.1	N/A	N/A	6.73415	0.0161323	OE
	Streb.8G017920.1	FBRL1	rRNA 2'-O-methyltransferase fibrillarin 1	1.66957	4.04374e-05	OE
	Streb.3G024220.1	YCIO	Uncharacterized protein YciO OS=Escherichia	8.1014	0.0127666	OE
	Streb.9G019020.1	HSP7Q	Heat shock 70 kDa	1.49438	0.000152926	OE
	Streb.10G009910.1	GPX1	Phospholipid hydroperoxide glutathione peroxidase,	7.22357	0.0174394	OE
	Streb.1G040340.1	UREG	Urease accessory protein G	1.99872	3.13909e-12	OE
	Streb.9G022000.1	N/A	N/A	2.65477	0.0104605	OE
	Streb.11G002550.1	MED23	Mediator of RNA polymerase	2.37938	0.0285505	OE
	Streb.5G001820.1	TBL16	Protein trichome birefringence-like 16	1.14046	9.22888e-05	OE
	Streb.6G003050.1	THIC1	Acetyl-CoA acetyltransferase, cytosolic 1	1.1507	1.53639e-07	OE
	Streb.1G018320.1	TPT	Triose phosphate/phosphate translocator, chloroplastic	9.63492	3.79769e-18	OE
	Streb.1G049090.1	RUN1	Disease resistance protein RUN1	2.8502	4.08284e-32	OE
	Streb.Contig03387G000010.1	KEA3	K(+) efflux antiporter 3,	4.94142	0.000147808	OE
	Streb.2G048530.1	C82C4	Xanthotoxin 5-hydroxylase CYP82C4 OS=Arabidopsis	7.45441	0.0159427	OE
	Streb.5G016030.1	U082	Probable transcriptional regulatory protein	1.69938	1.26583e-08	OE
	Streb.11G010790.1	FB316	F-box protein At1g61340 OS=Arabidopsis	3.37038	0.000279677	OE
	Streb.3G023120.1	REXO4	RNA exonuclease 4 OS=Saccharomyces	4.24934	0.00213365	OE
	Streb.1G044290.1	N/A	N/A	4.5849	2.49056e-07	OE
	Streb.2G039530.1	RPV1	Disease resistance protein RPV1	2.38217	9.96477e-06	OE
	Streb.5G014850.1	TPPG	Probable trehalose-phosphate phosphatase G	1.98274	0.00511785	OE
	Streb.5G012190.1	N/A	N/A	6.2912	5.87699e-06	OE
	Streb.1G008890.1	Y5597	Probable receptor-like protein kinase	1.44227	2.01985e-08	OE
	Streb.10G021870.1	N/A	N/A	1.85062	0.00754337	OE
	Streb.7G009500.1	YSL3	Metal-nicotianamine transporter YSL3 OS=Arabidopsis	1.42859	8.27079e-13	OE
	Streb.6G024130.1	RUN1	Disease resistance protein RUN1	2.21695	7.59005e-05	OE
	Streb.1G006290.1	PTC52	Protochlorophyllide-dependent translocon component 52,	2.12749	0.000353006	OE
	Streb.10G007480.1	N/A	N/A	1.97412	0.000744985	OE
	Streb.Contig00481G000010.1	AVT1A	Amino acid transporter AVT1A	4.58335	0.00284781	OE
	Streb.1G023600.1	N/A	N/A	1.82016	3.47878e-61	OE
	Streb.7G026930.1	N/A	N/A	7.11451	4.11681e-38	OE
	Streb.2G016750.1	POL	Gag-Pol polyprotein OS=Cas-Br-E murine	9.55527	3.23615e-07	OE
	Streb.7G012530.1	N/A	N/A	2.46379	0.00113347	OE
	Streb.5G001010.1	UGT76H1	UDP-glycosyltransferase 76H1 OS=Stevia rebaudiana	7.58881	3.90833e-06	OE
	Streb.4G012440.1	N/A	N/A	1.98826	2.5451e-08	OE
	Streb.11G027650.1	FH13	Formin-like protein 13 OS=Arabidopsis	1.93893	0.0158815	OE
	Streb.7G018460.1	PER17	Peroxidase 17 OS=Arabidopsis thaliana	1.68287	9.79412e-05	OE
	Streb.11G026420.1	WRK11	Probable WRKY transcription factor	2.17264	0.00105614	OE
	Streb.1G029110.1	N/A	N/A	7.68026	0.000386209	OE
	Streb.5G016210.1	VHAA1	V-type proton ATPase subunit	1.28064	0.00362718	OE
	Streb.3G011100.1	HIP1	Probable E3 ubiquitin-protein ligase	1.59241	0.000143009	OE
	Streb.1G009630.1	WAKLB	Wall-associated receptor kinase-like 2	1.84254	2.11404e-08	OE
	Streb.7G006500.1	DTX17	Protein DETOXIFICATION 17 OS=Arabidopsis	2.2994	7.67412e-07	OE
	Streb.10G029550.1	N/A	N/A	3.38451	0.00240367	OE
	Streb.10G009700.1	Y1675	G-type lectin S-receptor-like serine/threonine-protein	1.28853	3.55323e-05	OE
	Streb.7G007020.1	N/A	N/A	1.45888	0.00228235	OE
	Streb.1G017510.1	AUG7	AUGMIN subunit 7 OS=Arabidopsis	1.18569	0.000275786	OE
	Streb.7G010060.1	ZFNL	Zinc finger CCCH domain-containing	6.43692	0.00696155	OE
	Streb.8G028210.1	N/A	N/A	-2.80856	0.00283047	UE
	Streb.4G004500.1	N/A	N/A	-1.1195	0.000849391	UE
	Streb.2G001980.1	KINGL	SNF1-related protein kinase regulatory	-1.56023	7.64851e-10	UE
	Streb.Contig04196G000020.1	FERON	Receptor-like protein kinase FERONIA	-1.60582	0.0144663	UE
	Streb.1G043270.1	SUS2	Sucrose synthase 2 OS=Pisum	-1.49496	5.543e-06	UE
	Streb.Contig00513G000010.1	PCRK1	Serine/threonine-protein kinase PCRK1 OS=Arabidopsis	-1.55902	0.000156068	UE
	Streb.Contig05104G000020.1	REL2	Protein ROLLING AND ERECT	-2.11885	8.27044e-12	UE
	Streb.1G042230.1	N/A	N/A	-1.70605	0.00590906	UE
	Streb.8G034190.1	N/A	N/A	-1.66631	0.0116795	UE
	Streb.1G019480.1	N/A	N/A	-4.98175	0.000620882	UE
	Streb.3G031410.1	LTL1	GDSL esterase/lipase LTL1 OS=Arabidopsis	-5.40604	0.000829674	UE
	Streb.9G006670.1	ATH1	Homeobox protein ATH1 OS=Arabidopsis	-1.57799	0.000168733	UE
	Streb.7G002650.1	KIRO	Kirola OS=Actinidia deliciosa OX=3627	-3.35694	0.00060983	UE
	Streb.6G034280.1	N/A	N/A	-1.53337	8.21728e-12	UE
	Streb.1G027290.1	AUX28	Auxin-induced protein AUX28 OS=Glycine	-1.53523	0.0175222	UE
	Streb.1G030690.1	WTR42	WAT1-related protein At5g40240 OS=Arabidopsis	-3.60914	4.28924e-16	UE
	Streb.1G026130.1	N/A	N/A	-1.23623	6.00523e-25	UE
	Streb.2G022840.1	N/A	N/A	-1.33067	1.42908e-05	UE
	Streb.5G017200.1	CAND7	Protein CANDIDATE G-PROTEIN COUPLED	-1.31278	1.61246e-19	UE
	Streb.6G033020.1	RPB2	DNA-directed RNA polymerase II	-3.50602	0.00019726	UE
	Streb.10G013130.1	AAP2	Amino acid permease 2	-1.46696	0.00106308	UE
	Streb.2G022540.1	N/A	N/A	-1.69783	4.64389e-11	UE
	Streb.1G038570.1	N/A	N/A	-2.47253	2.73399e-12	UE
	Streb.5G032560.1	N/A	N/A	-1.43036	0.00622101	UE
	Streb.4G019040.1	TPS2	Alpha-isocomene synthase OS=Matricaria chamomilla	-9.02454	0.0133895	UE
	Streb.9G008860.1	TI10A	Protein TIFY 10A OS=Arabidopsis	-1.58231	0.00369121	UE
	Streb.8G020320.1	N/A	N/A	-1.99929	0.0227778	UE
	Streb.6G014630.1	WDR76	WD repeat-containing protein 76	-4.60302	1.54741e-06	UE
	Streb.7G022580.1	FSTL	Flavonol sulfotransferase-like OS=Flaveria bidentis	-5.77101	0.000349164	UE
	Streb.4G011730.1	GDL64	GDSL esterase/lipase At4g16230 OS=Arabidopsis	-11.8206	0.000603557	UE
	Streb.8G021150.1	ACR9	ACT domain-containing protein ACR9	-1.79179	0.00428683	UE
	Streb.9G014120.1	N/A	N/A	-1.58307	0.0158945	UE
	Streb.11G019550.1	N/A	N/A	-6.77552	0.0171159	UE
	Streb.11G025360.1	CLP	Chitinase CLP OS=Oryza sativa	-7.7808	0.0163966	UE
	Streb.2G021630.1	SCE1	SUMO-conjugating enzyme SCE1 OS=Arabidopsis	-1.20227	1.08499e-61	UE
	Streb.7G008450.1	SOK5	Protein SOSEKI 5 OS=Arabidopsis	-1.80739	1.33927e-05	UE
	Streb.11G017180.1	N/A	N/A	-1.60045	1.61495e-07	UE
	Streb.2G060980.1	TPL	Protein TOPLESS OS=Arabidopsis thaliana	-1.1731	4.38219e-05	UE
	Streb.1G040140.1	ALL9	Glucan endo-1,3-beta-D-glucosidase OS=Olea europaea	-6.91951	7.66039e-08	UE
	Streb.8G025490.1	YI31B	Transposon Ty3-I Gag-Pol polyprotein	-6.39733	0.000183914	UE
	Streb.2G045810.1	GATL2	Probable galacturonosyltransferase-like 2 OS=Arabidopsis	-1.78477	0.00894819	UE
	Streb.10G010780.1	N/A	N/A	-1.33431	5.26151e-06	UE
	Streb.4G025000.1	N/A	N/A	-7.38847	2.09131e-07	UE
	Streb.Contig05310G000020.1	N/A	N/A	-9.64606	1.3854e-106	UE
	Streb.2G032830.1	FABZ	3-hydroxyacyl-[acyl-carrier-protein] dehydratase FabZ OS=Thermosynechococcus	-1.55996	0.0222911	UE
	Streb.3G009020.1	P2C40	Probable protein phosphatase 2C	-1.60666	0.00121907	UE
	Streb.1G038640.1	N/A	N/A	-6.48819	0.0339873	UE
	Streb.9G022380.1	CSPL8	CASP-like protein 4A3 OS=Arabidopsis	-1.28171	1.72414e-06	UE
	Streb.Contig00680G000040.1	N/A	N/A	-9.76787	0.0034367	UE
	Streb.9G009830.1	UCPA	Oxidoreductase UcpA OS=Salmonella typhimurium	-10.0943	0.000763891	UE
	Streb.2G028900.1	NCPR1	NADPH--cytochrome P450 reductase 1	-1.53979	3.19093e-40	UE
	Streb.7G012280.1	POLX	Retrovirus-related Pol polyprotein from	-6.82351	0.00297437	UE
	Streb.10G024480.1	N/A	N/A	-1.26285	0.00203385	UE
	Streb.4G005670.1	FKB43	Peptidyl-prolyl cis-trans isomerase FKBP43	-8.82603	0.00502887	UE
	Streb.3G007930.1	B120	G-type lectin S-receptor-like serine/threonine-protein	-10.2147	0.0149062	UE
	Streb.Contig03625G000030.1	FLA21	Fasciclin-like arabinogalactan protein 21	-1.7131	0.000535855	UE
	Streb.6G022190.1	Y1668	Probable inactive leucine-rich repeat	-1.79597	3.89703e-06	UE
	Streb.Contig00191G000030.1	N/A	N/A	-2.03424	0.00122047	UE
	Streb.9G022960.1	N/A	N/A	-3.35831	0.00142137	UE
	Streb.7G001920.1	FAR1	Protein FAR-RED IMPAIRED RESPONSE	-1.11516	0.000189963	UE
	Streb.7G003330.1	LHTL6	Lysine histidine transporter-like 6	-2.07813	0.00224422	UE
	Streb.5G019970.1	PHSC	Probable polyamine transporter At3g13620	-8.93422	0.00708714	UE
	Streb.1G036570.1	WOX1	WUSCHEL-related homeobox 1 OS=Arabidopsis	-4.4236	0.0224054	UE
	Streb.9G016070.1	COMT1	Caffeic acid 3-O-methyltransferase OS=Rosa	-12.7111	4.41811e-05	UE
	Streb.10G012030.1	DOR	F-box protein DOR OS=Arabidopsis	-1.07123	0.00103961	UE
	Streb.4G008240.1	N/A	N/A	-2.5901	8.45082e-05	UE
	Streb.4G019030.1	TPS2	Alpha-isocomene synthase OS=Matricaria chamomilla	-8.46698	0.00504267	UE
	Streb.10G026350.1	TRL11	Thioredoxin-like 1-1, chloroplastic OS=Arabidopsis	-14.3564	0.000103906	UE
	Streb.3G004190.1	N/A	N/A	-8.23518	7.79806e-09	UE
	Streb.1G028490.1	GLR13	Glutamate receptor 1.3 OS=Arabidopsis	-1.75929	1.47844e-59	UE
	Streb.1G033760.1	UGT91A1	UDP-glycosyltransferase 91A1 OS=Arabidopsis thaliana	-2.14978	0.000377835	UE
	Streb.1G000290.1	PDV1	Plastid division protein PDV1	-1.26823	6.53098e-15	UE
	Streb.11G002150.1	C81E8	Cytochrome P450 8.10E+09 OS=Medicago	-10.8931	0.000382295	UE
	Streb.9G018570.1	PUX4	Plant UBX domain-containing protein	-1.48952	1.81564e-17	UE
	Streb.6G000760.1	Y3720	UPF0481 protein At3g47200 OS=Arabidopsis	-1.56746	4.92767e-06	UE
	Streb.9G005110.1	N/A	N/A	-1.30961	1.61542e-14	UE
	Streb.9G002130.1	N/A	N/A	-2.74899	2.2744e-10	UE
	Streb.7G003420.1	RLP4	Receptor-like protein 4 OS=Arabidopsis	-2.24983	0.000512515	UE
	Streb.8G009230.1	N/A	N/A	-3.94527	4.81887e-15	UE
	Streb.3G031010.1	ECI1	Enoyl-CoA delta isomerase 1,	-1.38794	7.57996e-06	UE
	Streb.9G018210.1	N/A	N/A	-1.23415	1.0664e-06	UE
	Streb.6G032660.1	RPB2	DNA-directed RNA polymerase II	-3.24486	0.000683914	UE
	Streb.4G019100.1	N/A	N/A	-1.2999	1.09578e-05	UE
	Streb.1G021740.1	DIR21	Dirigent protein 21 OS=Arabidopsis	-7.93598	0.0131613	UE
	Streb.3G004460.1	N/A	N/A	-1.63697	0.000780017	UE
	Streb.7G022600.1	FSTL	Flavonol sulfotransferase-like OS=Flaveria bidentis	-7.33937	0.00010929	UE
	Streb.10G019060.1	BDG3	Probable lysophospholipase BODYGUARD 3	-1.68419	0.016344	UE
	Streb.2G042950.1	ASPA	Aspartyl protease family protein	-7.34169	0.00189485	UE
	Streb.1G012640.1	C7A29	Cytochrome P450 CYP72A219 OS=Panax	-6.86924	5.21701e-133	UE
	Streb.7G022720.1	FSTL	Flavonol sulfotransferase-like OS=Flaveria bidentis	-6.10335	1.27302e-06	UE
	Streb.7G018970.1	ADH1	Alcohol dehydrogenase 1 OS=Tanacetum	-8.06881	0.0146794	UE
	Streb.6G028940.1	PHYE	Phytochrome E OS=Ipomoea nil	-2.47383	3.3966e-06	UE
	Streb.6G003610.1	N/A	N/A	-2.0753	1.28998e-07	UE
	Streb.4G025410.1	NRAM6	Metal transporter Nramp6 OS=Arabidopsis	-1.80242	2.45696e-32	UE
	Streb.7G022820.1	NHL26	NDR1/HIN1-like protein 26 OS=Arabidopsis	-1.94574	0.00261594	UE
	Streb.1G001490.1	OLEL	Oleosin L OS=Sesamum indicum	-2.6487	1.34124e-08	UE
	Streb.4G002760.1	YI31B	Transposon Ty3-I Gag-Pol polyprotein	-3.35488	7.79619e-25	UE
	Streb.9G018450.1	ACCO2	1-aminocyclopropane-1-carboxylate oxidase 2 OS=Malus	-1.53675	0.000395553	UE
	Streb.11G015180.1	TC10A	3-dehydrosphinganine reductase TSC10A OS=Arabidopsis	-2.28615	0.00172173	UE
	Streb.Contig03964G000010.1	PRU1	Major allergen Pru ar	-7.39324	3.02919e-05	UE
	Streb.10G021910.1	AB17C	Alpha/beta hydrolase domain-containing protein	-1.22126	5.64759e-10	UE
	Streb.1G037180.1	IMPA1	Importin subunit alpha-1 OS=Arabidopsis	-10.0696	0.0099308	UE
	Streb.2G060220.1	ERF82	Ethylene-responsive transcription factor 3	-1.58899	0.000112867	UE
	Streb.2G039290.1	N/A	N/A	-1.6667	0.00280032	UE
	Streb.6G031620.1	COL16	Zinc finger protein CONSTANS-LIKE	-1.25311	0.0188276	UE
	Streb.5G033920.1	GINT1	Glucosamine inositolphosphorylceramide transferase 1	-1.886	0.00223582	UE
	Streb.9G023720.1	POLX	Retrovirus-related Pol polyprotein from	-2.5869	0.00159129	UE
	Streb.4G016890.1	DRL42	Probable disease resistance protein	-1.982	0.0144064	UE
	Streb.4G007040.1	ERF99	Ethylene-responsive transcription factor 13	-5.24917	0.0113881	UE
	Streb.Contig05897_ERROPOS2000000G000050.1	OSS2	Organ-specific protein S2 OS=Pisum	-3.06361	0.01647	UE
	Streb.9G009410.1	ACA11	Putative calcium-transporting ATPase 11,	-1.53627	1.62487e-06	UE
	Streb.3G012300.1	KCS4	3-ketoacyl-CoA synthase 4 OS=Arabidopsis	-1.23723	2.81983e-05	UE
	Streb.9G002890.1	SPXM3	SPX domain-containing membrane protein	-1.91497	9.19356e-06	UE
	Streb.5G014400.1	GSTT1	Glutathione S-transferase T1 OS=Arabidopsis	-6.45814	0.000898788	UE
	Streb.7G003940.1	FDL1	F-box/FBD/LRR-repeat protein At1g13570 OS=Arabidopsis	-2.8384	3.71721e-09	UE
	Streb.1G029840.1	CP19D	Peptidyl-prolyl cis-trans isomerase CYP19-4	-1.4767	3.42469e-14	UE
	Streb.Contig00560G000010.1	N/A	N/A	-3.41745	0.00277823	UE
	Streb.1G048880.1	KCS12	3-ketoacyl-CoA synthase 12 OS=Arabidopsis	-2.05912	0.00122804	UE
	Streb.4G022610.1	MYB06	Myb-related protein 306 OS=Antirrhinum	-1.89964	0.000744578	UE
	Streb.Contig00657G000010.1	KAN2	Probable transcription factor KAN2	-1.43179	8.42503e-08	UE
	Streb.8G017830.1	FBRL1	rRNA 2'-O-methyltransferase fibrillarin 1	-12.0479	0.000630815	UE
	Streb.Contig05673_ERROPOS51838G000020.1	YIPF1	Protein YIPF1 homolog OS=Dictyostelium	-10.9647	0.00139059	UE
	Streb.9G019110.1	C7A94	Beta-amyrin 28-monooxygenase OS=Kalopanax septemlobus	-7.85852	1.40849e-33	UE
	Streb.7G015070.1	EXL3	GDSL esterase/lipase EXL3 OS=Arabidopsis	-1.65963	0.000292281	UE
	Streb.Contig05927_ERROPOS1434176G000050.1	SBT17	Subtilisin-like protease SBT1.7 OS=Arabidopsis	-4.36097	0.0295254	UE
	Streb.6G025270.1	N/A	N/A	-2.03845	0.0158948	UE
	Streb.9G013850.1	HKT1	Sodium transporter HKT1 OS=Arabidopsis	-3.8485	0.000212213	UE
	Streb.7G004850.1	SEC14	Sec14 cytosolic factor OS=Schizosaccharomyces	-1.91049	0.00258605	UE
	Streb.1G019490.1	YI31B	Transposon Ty3-I Gag-Pol polyprotein	-4.26388	2.25764e-06	UE
	Streb.1G030660.1	WTR41	WAT1-related protein At5g40230 OS=Arabidopsis	-5.63951	0.00109859	UE
	Streb.6G030040.1	MYC4	Transcription factor MYC4 OS=Arabidopsis	-3.48722	7.37036e-08	UE
	Streb.8G018720.1	N/A	N/A	-1.99112	0.010586	UE
	Streb.9G012230.1	C94A1	Cytochrome P450 94A1 OS=Vicia	-1.89437	7.9858e-10	UE
	Streb.9G016060.1	G2OX1	Gibberellin 2-beta-dioxygenase 1 OS=Pisum	-2.1467	0.00673255	UE
	Streb.6G025230.1	N/A	N/A	-2.44059	0.000768878	UE
	Streb.1G014430.1	N/A	N/A	-1.64633	7.50577e-11	UE
	Streb.5G013930.1	PUM12	Pumilio homolog 12 OS=Arabidopsis	-8.02604	0.0083817	UE
	Streb.3G007880.1	CE101	G-type lectin S-receptor-like serine/threonine-protein	-3.48689	0.00545022	UE
	Streb.9G026690.1	FER1	Ferredoxin-1, chloroplastic OS=Mesembryanthemum crystallinum	-1.22315	0.00351144	UE
	Streb.5G030660.1	LOL3	Protein LOL3 OS=Oryza sativa	-1.09813	0.0040594	UE
	Streb.8G003670.1	GPX4	Probable glutathione peroxidase 4	-2.18544	2.44584e-05	UE
	Streb.10G004780.1	VPE	Vacuolar-processing enzyme OS=Ricinus communis	-9.71967	0.00757288	UE
	Streb.1G046280.1	FATA	Oleoyl-acyl carrier protein thioesterase,	-10.7676	6.1883e-05	UE
	Streb.9G011670.1	IMCL2	Probable isoprenylcysteine alpha-carbonyl methylesterase	-2.5538	0.000561869	UE
	Streb.11G005400.1	TBCC	Tubulin-folding cofactor C OS=Arabidopsis	-1.43412	2.16131e-06	UE
	Streb.10G006310.1	BRH1	Brassinosteroid-responsive RING protein 1	-4.35727	0.00479168	UE
	Streb.11G029400.1	N/A	N/A	-1.57742	0.000153549	UE
	Streb.2G029670.1	C7DD6	Eupatolide synthase OS=Helianthus annuus	-2.68137	0.0160943	UE
	Streb.5G033410.1	PAO5	Probable polyamine oxidase 5	-3.15916	0.00132474	UE
	Streb.9G003220.1	YAB1	Axial regulator YABBY 1	-2.6532	0.00010697	UE
	Streb.1G048990.1	RUN1	Disease resistance protein RUN1	-1.53911	2.40012e-05	UE
	Streb.2G030240.1	N/A	N/A	-1.54936	0.00151486	UE
	Streb.11G003970.1	N/A	N/A	-2.96133	9.83168e-07	UE
	Streb.2G001500.1	AVT1I	Amino acid transporter AVT1I	-2.18136	0.00909086	UE
	Streb.2G014220.1	N/A	N/A	-1.6276	2.48654e-09	UE
	Streb.6G022150.1	TMKL1	Putative kinase-like protein TMKL1	-7.05234	0.0124234	UE
	Streb.1G014640.1	BZR1	Protein BRASSINAZOLE-RESISTANT 1 OS=Arabidopsis	-1.53142	4.69542e-06	UE
	Streb.10G006200.1	C87A3	Cytochrome P450 87A3 OS=Oryza	-9.79464	1.98346e-05	UE
	Streb.3G006630.1	N/A	N/A	-9.63338	0.00300573	UE
	Streb.4G008530.1	AATF	Protein AATF OS=Gallus gallus	-10.9171	0.00139863	UE
	Streb.7G021050.1	BZIP2	bZIP transcription factor 2	-2.67357	6.08811e-06	UE
	Streb.5G021610.1	ERF62	Ethylene-responsive transcription factor ERF062	-7.51601	0.0230556	UE
	Streb.10G017510.1	APSR1	Protein ALTERED PHOSPHATE STARVATION	-1.52946	3.0632e-08	UE
	Streb.9G029700.1	ENT8	Equilibrative nucleotide transporter 8	-8.84455	0.0184087	UE
	Streb.5G014110.1	P2A12	F-box protein PP2-A12 OS=Arabidopsis	-1.42149	0.00572254	UE
	Streb.8G013920.1	N/A	N/A	-2.08995	0.0199392	UE
	Streb.1G025320.1	HSP11	1.73E+01 kDa class I	-5.0092	0.0118143	UE
	Streb.11G023870.1	BIG1A	Protein BIG GRAIN 1-like	-1.76391	0.0011337	UE
	Streb.1G024280.1	N/A	N/A	-8.03257	4.28987e-06	UE
	Streb.1G013490.1	N/A	N/A	-6.60829	0.00390819	UE
	Streb.1G006270.1	M860	Uncharacterized mitochondrial protein AtMg00860	-7.50982	2.44506e-08	UE
	Streb.4G014690.1	FBL23	Putative F-box/LRR-repeat protein 23	-8.99693	0.0048768	UE
	Streb.Contig04441G000010.1	MTR2	Probable methyltransferase TCM_000331 OS=Theobroma	-12.4731	0.00344257	UE
	Streb.4G017950.1	SNAT2	Serotonin N-acetyltransferase 2, chloroplastic	-1.21977	0.00106939	UE
	Streb.5G029970.1	FERON	Receptor-like protein kinase FERONIA	-9.96931	0.00351688	UE
	Streb.11G025340.1	CLP	Chitinase CLP OS=Oryza sativa	-11.232	0.0147847	UE
	Streb.7G016130.1	N/A	N/A	-8.07085	0.0154554	UE
	Streb.6G021490.1	OXI1	Serine/threonine-protein kinase OXI1 OS=Arabidopsis	-8.16793	4.29348e-05	UE
	Streb.5G024850.1	DTX28	Protein DETOXIFICATION 28 OS=Arabidopsis	-8.79944	0.000514266	UE
	Streb.2G061740.1	S61G2	Protein transport protein Sec61	-1.9261	0.00251213	UE
	Streb.1G047520.1	FLX	Protein FLC EXPRESSOR OS=Arabidopsis	-6.64708	3.68451e-07	UE
	Streb.2G017200.1	PTR7	Protein NRT1/ PTR FAMILY	-1.98047	0.00414013	UE
	Streb.1G000540.1	DCR	BAHD acyltransferase DCR OS=Arabidopsis	-2.69852	5.53937e-11	UE
	Streb.11G013690.1	N/A	N/A	-2.00746	1.45237e-05	UE
	Streb.2G011290.1	N/A	N/A	-3.58052	0.0200764	UE
	Streb.10G019090.1	YSL3	Metal-nicotianamine transporter YSL3 OS=Arabidopsis	-2.60335	2.31732e-28	UE
	Streb.10G013420.1	SBT3H	Subtilisin-like protease SBT3.17 OS=Arabidopsis	-1.38389	7.24773e-12	UE
	Streb.1G047080.1	R13L1	Putative disease resistance RPP13-like	-11.0457	0.000882673	UE
	Streb.9G029660.1	YI31B	Transposon Ty3-I Gag-Pol polyprotein	-6.51971	2.20054e-15	UE
	Streb.9G004750.1	P2SAF	Photosystem II stability/assembly factor	-1.15682	0.00714456	UE
	Streb.2G003570.1	C3H19	Zinc finger CCCH domain-containing	-14.2571	9.73197e-05	UE
	Streb.1G024610.1	C76B6	Geraniol 8-hydroxylase OS=Catharanthus roseus	-5.09959	0.00117763	UE
	Streb.2G047610.1	NADK2	NAD kinase 2, chloroplastic	-1.44242	7.47637e-06	UE
	Streb.1G031380.1	PUP3	Purine permease 3 OS=Arabidopsis	-1.82162	2.01755e-10	UE
	Streb.10G018580.1	IAA18	Auxin-responsive protein IAA18 OS=Arabidopsis	-1.78299	0.00176242	UE
	Streb.1G030450.1	DIV	Transcription factor DIVARICATA OS=Antirrhinum	-1.55412	0.0004141	UE
	Streb.1G000010.1	SLP1	Shewanella-like protein phosphatase 1	-1.35364	0.00132956	UE
	Streb.7G025660.1	N/A	N/A	-3.93257	2.21855e-10	UE
	Streb.2G027390.1	PAO5	Probable polyamine oxidase 5	-2.62868	3.82915e-07	UE
	Streb.3G015370.1	EIX2	Receptor-like protein EIX2 OS=Solanum	-1.50455	0.000135475	UE
	Streb.8G033430.1	CCR1	Cinnamoyl-CoA reductase 1 OS=Petunia	-5.93276	0.000367764	UE
	Streb.4G024790.1	ACP4	Acyl carrier protein 4,	-1.23304	0.0213269	UE
	Streb.5G029760.1	FERON	Receptor-like protein kinase FERONIA	-1.45903	0.00822193	UE
	Streb.2G017460.1	ASP63	Probable aspartyl protease At4g16563	-1.62122	0.00657444	UE
	Streb.4G002690.1	N/A	N/A	-1.93952	0.000308228	UE
	Streb.5G016380.1	N/A	N/A	-7.24052	0.00534515	UE
	Streb.7G022590.1	FSTL	Flavonol sulfotransferase-like OS=Flaveria bidentis	-9.54308	3.95976e-08	UE
	Streb.11G004290.1	IDD15	Zinc finger protein SHOOT	-4.15026	0.0112126	UE
	Streb.5G003520.1	MLP43	MLP-like protein 43 OS=Arabidopsis	-6.96478	0.0316412	UE
	Streb.7G004190.1	TPC12	Trafficking protein particle complex	-2.71222	1.54164e-22	UE
	Streb.4G014220.1	DEGP9	Protease Do-like 9 OS=Arabidopsis	-9.73038	0.00680803	UE
	Streb.2G013520.1	MCAT	Mitochondrial carnitine/acylcarnitine carrier-like protein	-1.37437	0.0001536	UE
	Streb.10G012360.1	N/A	N/A	-7.09455	8.75106e-06	UE
	Streb.1G028860.1	IF2B	Eukaryotic translation initiation factor	-12.8665	0.000286901	UE
	Streb.11G025990.1	ARFE	Auxin response factor 5	-1.08897	0.0103208	UE
	Streb.3G022560.1	CRR7	Protein CHLORORESPIRATORY REDUCTION 7,	-6.56753	0.0366473	UE
	Streb.7G007040.1	N/A	N/A	-12.4348	0.00203081	UE
	Streb.11G009600.1	SYAP	Alanine--tRNA ligase, chloroplastic/mitochondrial OS=Populus	-1.49669	3.09614e-07	UE
	Streb.Contig00580G000010.1	CAMT	Caffeoyl-CoA O-methyltransferase OS=Zinnia violacea	-1.61442	0.0149948	UE
	Streb.1G034630.1	MAP22	Methionine aminopeptidase 2B OS=Arabidopsis	-1.36452	1.72029e-63	UE
	Streb.6G017900.1	PUN1	Acyltransferase Pun1 OS=Capsicum frutescens	-6.9565	0.0161769	UE
	Streb.8G014460.1	YCF4	Photosystem I assembly protein	-1.54181	0.00612518	UE
	Streb.1G038320.1	UGT73E1	UDP-glycosyltransferase 7.30E+02 OS=Stevia rebaudiana	-1.61901	4.569e-05	UE
	Streb.3G018150.1	UBB	Polyubiquitin-B OS=Ovis aries OX=9940	-1.15475	0.00155087	UE
	Streb.6G005230.1	POL	Pro-Pol polyprotein OS=Feline foamy	-2.30267	3.32763e-05	UE
	Streb.5G015070.1	YI31B	Transposon Ty3-I Gag-Pol polyprotein	-5.6884	1.95749e-07	UE
	Streb.8G010090.1	PBL11	Probable serine/threonine-protein kinase PBL11	-5.18173	6.19598e-36	UE
	Streb.10G018190.1	A70	Pathogen-associated molecular patterns-induced protein	-2.58224	0.000762931	UE
	Streb.5G014910.1	N/A	N/A	-6.73755	6.59284e-05	UE
	Streb.9G005520.1	ACD6	Protein ACCELERATED CELL DEATH	-8.63295	1.26047e-08	UE
	Streb.Contig03699G000010.1	N/A	N/A	-6.80638	0.00395141	UE
	Streb.1G046120.1	Y5838	Probably inactive leucine-rich repeat	-2.04987	3.6351e-14	UE
	Streb.5G007180.1	TECR	Very-long-chain enoyl-CoA reductase OS=Dictyostelium	-4.88707	6.71031e-06	UE
	Streb.8G006810.1	C81E8	Cytochrome P450 8.10E+09 OS=Medicago	-1.62632	2.00543e-06	UE
	Streb.1G046590.1	IBH1	Transcription factor IBH1 OS=Arabidopsis	-1.32672	0.0127619	UE
	Streb.1G003070.1	MYBF	Putative Myb family transcription	-1.25798	0.0149713	UE
	Streb.7G006250.1	OAT	Ornithine aminotransferase, mitochondrial OS=Oryza	-11.3282	0.000777432	UE
	Streb.10G018620.1	HRD1A	ERAD-associated E3 ubiquitin-protein ligase	-1.33676	1.43091e-29	UE
	Streb.7G027820.1	LOG3	Cytokinin riboside 5'-monophosphate phosphoribohydrolase	-1.42032	0.00294959	UE
	Streb.2G061890.1	SAT	Stemmadenine O-acetyltransferase OS=Catharanthus roseus	-1.78612	0.00493775	UE
	Streb.1G042410.1	NLTP	Non-specific lipid-transfer protein OS=Malus	-8.61965	1.92967e-06	UE
	Streb.5G015390.1	N/A	N/A	-1.89792	1.33364e-06	UE
	Streb.7G020510.1	PRA1D	PRA1 family protein D	-3.33529	0.00953421	UE
	Streb.1G028440.1	IBH1	Transcription factor IBH1 OS=Arabidopsis	-1.95932	3.53196e-06	UE
	Streb.9G017350.1	ATL65	RING-H2 finger protein ATL65	-2.6043	0.017974	UE
	Streb.1G012800.1	GSA	Glutamate-1-semialdehyde 2,1-aminomutase, chloroplastic OS=Nicotiana	-1.53586	2.55936e-05	UE
	Streb.5G032210.1	LYPA2	Acyl-protein thioesterase 2 OS=Homo	-1.69347	0.00703392	UE
	Streb.8G029080.1	KIRO	Kirola OS=Actinidia deliciosa OX=3627	-1.054	0.0123478	UE
	Streb.10G028430.1	N/A	N/A	-5.3744	9.73368e-05	UE
	Streb.9G031920.1	PUB26	U-box domain-containing protein 26	-1.3866	0.00100502	UE
	Streb.9G024720.1	LHTL8	Lysine histidine transporter-like 8	-8.23999	2.44668e-05	UE
	Streb.3G025260.1	ZAT5	Zinc finger protein ZAT5	-1.91276	0.000105936	UE
	Streb.7G019930.1	APSR1	Protein ALTERED PHOSPHATE STARVATION	-9.75696	0.00263586	UE
	Streb.2G057510.1	ZHD1	Zinc-finger homeodomain protein 1	-1.48441	0.00566939	UE
	Streb.1G048830.1	KCS12	3-ketoacyl-CoA synthase 12 OS=Arabidopsis	-2.45202	0.0261683	UE
	Streb.Contig04927G000010.1	N/A	N/A	-5.38209	0.0131083	UE
	Streb.2G007590.1	LIP	Lipase OS=Staphylococcus hyicus OX=1284	-1.51931	0.00315501	UE
	Streb.11G026790.1	AAPC	Putative glucose-6-phosphate 1-epimerase OS=Cenchrus	-1.59544	7.31066e-13	UE
	Streb.4G002770.1	N/A	N/A	-3.38476	6.44541e-13	UE
	Streb.Contig00716G000010.1	N/A	N/A	-1.55974	0.0175484	UE
	Streb.7G022670.1	N/A	N/A	-1.49586	0.00161477	UE
	Streb.9G009420.1	GSTX6	Probable glutathione S-transferase OS=Glycine	-1.8004	0.00738305	UE
	Streb.11G009680.1	G3PA	Glyceraldehyde-3-phosphate dehydrogenase A, chloroplastic	-1.50774	0.000800203	UE
	Streb.Contig03371G000010.1	N/A	N/A	-4.63332	1.10631e-41	UE
	Streb.5G018140.1	GATA9	GATA transcription factor 9	-1.5276	4.07376e-08	UE
	Streb.5G008710.1	SLAH3	S-type anion channel SLAH3	-1.27588	0.00315723	UE
	Streb.9G001690.1	KPRS2	Ribose-phosphate pyrophosphokinase 2, chloroplastic	-1.5593	0.0108785	UE
	Streb.1G003730.1	RCA1	Ribulose bisphosphate carboxylase/oxygenase activase	-1.4299	0.00961809	UE
	Streb.9G006620.1	GRXC6	Glutaredoxin-C6 OS=Arabidopsis thaliana OX=3702	-2.22869	0.000623452	UE
	Streb.Contig05342G000070.1	Y3720	UPF0481 protein At3g47200 OS=Arabidopsis	-2.59444	3.02263e-18	UE
	Streb.10G005690.1	C87A3	Cytochrome P450 87A3 OS=Oryza	-7.74944	0.000504312	UE
	Streb.3G014700.1	CXE18	Probable carboxylesterase 18 OS=Arabidopsis	-1.73321	0.000268484	UE
	Streb.2G040970.1	MIK2	MDIS1-interacting receptor like kinase	-2.23556	5.45948e-05	UE
	Streb.1G023140.1	LAX4	Auxin transporter-like protein 4	-2.35312	0.0083098	UE
	Streb.11G016050.1	N/A	N/A	-1.51094	0.00173367	UE
	Streb.4G019950.1	CYQ32	Cytochrome P450 81Q32 OS=Catharanthus	-1.95931	0.000509568	UE
	Streb.10G006240.1	N/A	N/A	-3.46059	0.0146892	UE
	Streb.10G013490.1	N/A	N/A	-8.02958	0.0114396	UE
	Streb.7G028130.1	GLYT3	Probable glycosyltransferase At5g03795 OS=Arabidopsis	-3.17142	0.0104604	UE
	Streb.11G031860.1	GLIP5	GDSL esterase/lipase 5 OS=Arabidopsis	-1.34918	0.000311325	UE
	Streb.Contig05897_ERROPOS1300000G000090.1	IF2P	Eukaryotic translation initiation factor	-10.2757	0.0100745	UE
	Streb.Contig04746G000030.1	UGT2	7-deoxyloganetin glucosyltransferase OS=Gardenia jasminoides	-1.11262	0.0201857	UE
	Streb.10G003540.1	N/A	N/A	-7.72047	2.68409e-05	UE
	Streb.1G035600.1	PABN3	Polyadenylate-binding protein 3 OS=Arabidopsis	-8.66423	0.00791266	UE
	Streb.7G010880.1	N/A	N/A	-1.36708	0.0181877	UE
	Streb.6G032730.1	JMT1	Probable jasmonic acid carboxyl	-7.14539	0.0210341	UE
	Streb.5G031010.1	MYOB7	Myosin-binding protein 7 OS=Arabidopsis	-2.20843	3.0073e-06	UE
	Streb.1G025900.1	CIPKB	CBL-interacting serine/threonine-protein kinase 11	-1.67966	5.75631e-05	UE
	Streb.1G031000.1	U161	UPF0161 protein At3g09310 OS=Arabidopsis	-1.39776	1.53557e-24	UE
	Streb.7G008580.1	RDO2	Transcription elongation factor TFIIS	-1.21748	0.00494545	UE
	Streb.2G047820.1	M3K1	Mitogen-activated protein kinase kinase	-11.8268	0.000489927	UE
	Streb.7G009630.1	MIP2	MAG2-interacting protein 2 OS=Arabidopsis	-1.81427	8.16654e-07	UE
	Streb.8G002280.1	AB21B	ABC transporter B family	-1.65728	0.000111779	UE
	Streb.2G016670.1	C76H2	Ferruginol synthase OS=Salvia fruticosa	-1.52619	0.00766131	UE
	Streb.5G001960.1	BAG5	BAG family molecular chaperone	-2.38252	0.00484	UE
	Streb.2G033840.1	Y5900	Putative receptor-like protein kinase	-1.61388	0.000132631	UE
	Streb.10G004940.1	C76B6	Geraniol 8-hydroxylase OS=Catharanthus roseus	-1.77523	0.00143856	UE
	Streb.6G032470.1	ERF80	Ethylene-responsive transcription factor 9	-1.39416	0.00392496	UE
	Streb.6G015170.1	IBL1	Transcription factor IBH1-like 1	-1.21157	0.0198664	UE
	Streb.3G001920.1	C04C1	Cytochrome P450 704C1 OS=Pinus	-2.73541	0.00550442	UE
	Streb.Contig05007G000030.1	LHTL6	Lysine histidine transporter-like 6	-2.15378	0.00219461	UE
	Streb.1G046060.1	N/A	N/A	-4.84216	4.50067e-07	UE
	Streb.4G012710.1	DOX1	Alpha-dioxygenase 1 OS=Arabidopsis thaliana	-7.85478	1.70621e-27	UE
	Streb.7G002640.1	MLP43	MLP-like protein 43 OS=Arabidopsis	-7.42932	1.22559e-17	UE
	Streb.10G021670.1	14KD	1.40E+01 kDa proline-rich protein	-8.3977	0.00914351	UE
	Streb.7G020590.1	NTPPB	7-methyl-GTP pyrophosphatase OS=Dictyostelium discoideum	-1.23407	0.00638336	UE
	Streb.3G028250.1	N/A	N/A	-4.53864	1.81659e-35	UE
	Streb.8G010290.1	UGT76H1	UDP-glycosyltransferase 76H1 OS=Stevia rebaudiana	-1.31761	1.21492e-07	UE
	Streb.8G008200.1	AMT13	Ammonium transporter 1 member	-1.68769	0.0097809	UE
	Streb.8G020240.1	UGT8	7-deoxyloganetic acid glucosyltransferase OS=Catharanthus	-1.99238	0.0100722	UE
	Streb.1G039730.1	SCL3	Scarecrow-like protein 3 OS=Arabidopsis	-5.57331	0.00543064	UE
	Streb.3G019850.1	N/A	N/A	-1.76216	0.000413483	UE
	Streb.1G015330.1	BZIP2	bZIP transcription factor 2	-2.23503	0.000739066	UE
	Streb.10G016060.1	N/A	N/A	-3.68633	0.000932062	UE
	Streb.2G007500.1	Y1790	BTB/POZ domain-containing protein At1g67900	-1.26649	1.43536e-05	UE
	Streb.3G000750.1	N/A	N/A	-1.82323	4.7451e-06	UE
	Streb.Contig04233G000010.1	C71B1	3-beta-hydroxylase OS=Tanacetum parthenium OX=127999	-2.33209	0.0036647	UE
	Streb.4G019920.1	CYQ32	Cytochrome P450 81Q32 OS=Catharanthus	-1.93449	0.00054613	UE
	Streb.7G003820.1	N/A	N/A	-1.20697	0.024062	UE
	Streb.4G025390.1	FEY	Dehydrogenase/reductase SDR family member	-9.00465	0.00690473	UE
	Streb.11G013710.1	KCS6	3-ketoacyl-CoA synthase 6 OS=Arabidopsis	-1.84433	5.56292e-06	UE
	Streb.1G001630.1	N/A	N/A	-2.03798	3.29128e-06	UE
	Streb.7G002350.1	PCR3	Protein PLANT CADMIUM RESISTANCE	-10.683	0.00690171	UE
	Streb.6G003700.1	N/A	N/A	-1.36874	1.78208e-05	UE
	Streb.2G001330.1	N/A	N/A	-1.55183	0.000957527	UE
	Streb.11G029950.1	SERC3	Serine incorporator 3 OS=Pongo	-1.66913	0.000622274	UE
	Streb.7G015780.1	PSI2	Protein PSK SIMULATOR 2	-2.02674	8.09636e-05	UE
	Streb.6G029380.1	FLS2	LRR receptor-like serine/threonine-protein kinase	-1.32825	5.41115e-08	UE
	Streb.5G004670.1	DCAM	S-adenosylmethionine decarboxylase proenzyme OS=Catharanthus	-1.48541	0.000185809	UE
	Streb.4G007650.1	N/A	N/A	-6.36445	0.0195813	UE
	Streb.1G038850.1	VA0E1	V-type proton ATPase subunit	-1.26992	2.62587e-07	UE
	Streb.6G008270.1	N/A	N/A	-8.63943	0.013291	UE
	Streb.11G017970.1	N/A	N/A	-8.94609	0.00704917	UE
	Streb.10G025110.1	ATL57	RING-H2 finger protein ATL57	-3.80937	0.00149636	UE
	Streb.Contig00018G000010.1	CML22	Probable calcium-binding protein CML22	-1.59938	0.00129039	UE
	Streb.11G020490.1	Y4230	G-type lectin S-receptor-like serine/threonine-protein	-1.99391	0.00221477	UE
	Streb.Contig03363G000050.1	Y14	RNA-binding protein Y14 OS=Arabidopsis	-1.2556	8.51626e-06	UE
	Streb.8G033060.1	MO2	Monooxygenase 2 OS=Arabidopsis thaliana	-1.75481	0.00536798	UE
	Streb.Contig00219G000010.1	SORCN	Sorcin OS=Schistosoma japonicum OX=6182	-8.84495	1.11163e-09	UE
	Streb.2G014330.1	KCO1	Two-pore potassium channel 1	-1.93345	0.0227261	UE
	Streb.2G053060.1	MIOX1	Inositol oxygenase 1 OS=Arabidopsis	-1.59045	0.00263362	UE
	Streb.1G017220.1	SCP16	Serine carboxypeptidase-like 16 OS=Arabidopsis	-2.57166	0.0045811	UE
	Streb.7G008480.1	MTP5	Metal tolerance protein 5	-1.47496	9.31223e-12	UE
	Streb.8G005180.1	C7A12	Cytochrome P450 CYP736A12 OS=Panax	-2.05875	1.5731e-13	UE
	Streb.9G023140.1	N/A	N/A	-1.44839	0.0171743	UE
	Streb.3G022990.1	PTR50	Protein NRT1/ PTR FAMILY	-1.7286	4.16857e-06	UE
	Streb.5G017190.1	PCP	Lysosomal Pro-X carboxypeptidase OS=Pongo	-1.46632	0.000852819	UE
	Streb.7G003620.1	NUDT1	Nudix hydrolase 1 OS=Arabidopsis	-4.05332	1.00818e-06	UE
	Streb.Contig02988G000010.1	N/A	N/A	-3.6472	1.86497e-11	UE
	Streb.4G005420.1	AG	Floral homeotic protein AGAMOUS	-2.17322	0.00929139	UE
	Streb.1G025940.1	CIPKB	CBL-interacting serine/threonine-protein kinase 11	-2.00315	0.00324461	UE
	Streb.1G040210.1	Y2446	Uncharacterized protein At2g34460, chloroplastic	-12.1016	0.00295396	UE
	Streb.2G026120.1	N/A	N/A	-5.20042	1.5191e-07	UE
	Streb.5G021730.1	TRC	Serine/threonine-protein kinase tricornered OS=Drosophila	-7.25831	0.000339572	UE
	Streb.2G019200.1	N/A	N/A	-8.3823	0.00539125	UE
	Streb.7G013410.1	N/A	N/A	-1.69284	1.10814e-06	UE
	Streb.2G039410.1	RIBF2	FAD synthetase 2, chloroplastic	-1.24566	0.018967	UE
	Streb.2G050130.1	MY1R1	Transcription factor MYB1R1 OS=Solanum	-1.41422	0.000500076	UE
	Streb.8G013700.1	C71B1	3-beta-hydroxylase OS=Tanacetum parthenium OX=127999	-9.01513	3.90075e-11	UE
	Streb.2G023480.1	N/A	N/A	-7.3922	0.0114386	UE
	Streb.10G014890.1	CKL4	Casein kinase 1-like protein	-9.11624	8.35865e-05	UE
	Streb.7G002620.1	MLP43	MLP-like protein 43 OS=Arabidopsis	-2.39142	0.00576718	UE
	Streb.9G011990.1	N/A	N/A	-3.86835	2.84043e-06	UE
	Streb.1G007170.1	Y3804	Probably inactive leucine-rich repeat	-1.84023	0.000422205	UE
	Streb.Contig04010G000050.1	NRT27	High affinity nitrate transporter	-3.04165	8.11886e-05	UE
	Streb.9G002210.1	DUF7	DUF724 domain-containing protein 7	-4.14924	9.38127e-19	UE
	Streb.7G000260.1	N/A	N/A	-2.50472	8.69113e-14	UE
	Streb.3G001430.1	GPAT8	Probable glycerol-3-phosphate acyltransferase 8	-1.80472	0.00439504	UE
	Streb.1G005630.1	CH20	2.00E+01 kDa chaperonin, chloroplastic	-1.3855	2.82815e-07	UE
	Streb.3G029480.1	ARFP	Auxin response factor 16	-2.84316	4.55866e-05	UE
	Streb.Contig01250G000010.1	N/A	N/A	-8.79191	0.00617236	UE
	Streb.1G005950.1	PDLP2	Plasmodesmata-located protein 2 OS=Arabidopsis	-1.46469	0.000679352	UE
	Streb.4G012730.1	UGT90A1	UDP-glycosyltransferase 90A1 OS=Arabidopsis thaliana	-1.48374	0.00333179	UE
	Streb.8G000320.1	PDC1	Pyruvate decarboxylase 1 OS=Arabidopsis	-8.99824	0.0149135	UE
	Streb.5G007960.1	Y4729	G-type lectin S-receptor-like serine/threonine-protein	-2.89472	9.03366e-30	UE
	Streb.6G010100.1	N/A	N/A	-7.76139	0.0153079	UE
	Streb.1G017570.1	N/A	N/A	-12.8511	0.000468213	UE
	Streb.3G017000.1	PIP27	Aquaporin PIP2-7 OS=Zea mays	-1.30697	0.0195313	UE
	Streb.2G026780.1	N/A	N/A	-6.03703	0.00761819	UE
	Streb.4G022830.1	PTR19	Protein NRT1/ PTR FAMILY	-3.13743	0.010376	UE
	Streb.1G042050.1	TPS5	(-)-germacrene D synthase OS=Matricaria	-3.26171	0.00424756	UE
	Streb.5G024670.1	DAAF1	Dynein axonemal assembly factor	-1.50156	8.4187e-13	UE
	Streb.4G019060.1	TPS2	Alpha-isocomene synthase OS=Matricaria chamomilla	-6.98315	0.0102845	UE
	Streb.5G003080.1	N/A	N/A	-7.36942	0.00164849	UE
	Streb.5G030320.1	N/A	N/A	-1.96441	0.0272017	UE
	Streb.9G012950.1	Y3720	UPF0481 protein At3g47200 OS=Arabidopsis	-9.41971	0.00236928	UE
	Streb.6G032820.1	ERF80	Ethylene-responsive transcription factor 9	-1.39459	0.00528085	UE
	Streb.Contig02167_ERROPOS576662G000050.1	CYB6	Cytochrome b6 OS=Helianthus annuus	-1.1517	0.0120804	UE
	Streb.1G034540.1	AAH2	Allantoate deiminase 2 OS=Glycine	-1.60335	5.26443e-07	UE
	Streb.11G000870.1	SMR6	Cyclin-dependent protein kinase inhibitor	-3.19046	1.52629e-05	UE
	Streb.2G007480.1	Y1790	BTB/POZ domain-containing protein At1g67900	-1.33139	5.87653e-05	UE
	Streb.1G048390.1	B2	B2 protein OS=Daucus carota	-4.03477	0.0164962	UE
	Streb.5G019270.1	TF2H2	General transcription factor IIH	-1.12995	0.00191783	UE
	Streb.5G000440.1	NAT6	Nucleobase-ascorbate transporter 6 OS=Arabidopsis	-10.6847	0.00169939	UE
	Streb.3G016550.1	LERK2	G-type lectin S-receptor-like serine/threonine-protein	-2.26702	0.00219949	UE
	Streb.5G003330.1	PME6	Probable pectinesterase/pectinesterase inhibitor 6	-3.03319	0.000847047	UE
	Streb.Contig05342G000060.1	N/A	N/A	-7.17991	1.99287e-31	UE
	Streb.Contig00537G000020.1	3MAT	Malonyl-coenzyme A:anthocyanin 3-O-glucoside-6''-O-malonyltransferase OS=Dahlia	-1.37428	0.00331018	UE
	Streb.1G044580.1	YI31B	Transposon Ty3-I Gag-Pol polyprotein	-4.08313	1.60779e-10	UE
	Streb.Contig05927_ERROPOS1234176G000110.1	IFRD1	Interferon-related developmental regulator 1	-1.53848	2.23191e-06	UE
	Streb.1G025890.1	EPFL6	EPIDERMAL PATTERNING FACTOR-like protein	-1.61892	0.0126214	UE
	Streb.6G006730.1	Y4729	G-type lectin S-receptor-like serine/threonine-protein	-2.44707	0.00439439	UE
	Streb.11G019870.1	SKP1B	SKP1-like protein 1B OS=Arabidopsis	-3.83411	9.59179e-17	UE
	Streb.7G025920.1	HERK	Receptor-like protein kinase HERK	-7.17232	1.2671e-47	UE
	Streb.1G017850.1	FB119	F-box protein At2g27310 OS=Arabidopsis	-9.48481	7.05823e-09	UE
	Streb.Contig03178G000020.1	TRXM4	Thioredoxin M4, chloroplastic OS=Arabidopsis	-1.35812	0.000158558	UE
	Streb.5G001200.1	N/A	N/A	-1.9145	0.00122664	UE
	Streb.Contig03077G000050.1	RAP23	Ethylene-responsive transcription factor RAP2-3	-7.27646	0.000189881	UE
	Streb.6G013000.1	N/A	N/A	-1.20621	0.00145454	UE
	Streb.8G000470.1	N/A	N/A	-1.30354	0.018483	UE
	Streb.8G022300.1	N/A	N/A	-1.43314	0.0138792	UE
	Streb.1G038630.1	EAP3	Protein ENDOPLASMIC RETICULUM-ARRESTED PEN3	-1.47695	2.3439e-07	UE
	Streb.6G032010.1	GSOX5	Flavin-containing monooxygenase FMO GS-OX5	-11.309	0.00125929	UE
	Streb.2G043670.1	TRC	Serine/threonine-protein kinase tricornered OS=Drosophila	-5.60087	0.000162091	UE
	Streb.11G023320.1	ZW2	Protein ZW2 OS=Arabidopsis thaliana	-1.58234	0.00664687	UE
	Streb.2G049670.1	HDA5	Histone deacetylase 5 OS=Arabidopsis	-1.46648	4.41631e-12	UE
	Streb.6G034200.1	ASAT1	Acyl-CoA--sterol O-acyltransferase 1 OS=Arabidopsis	-1.35786	1.47807e-05	UE
	Streb.2G004630.1	N/A	N/A	-2.39509	0.000519091	UE
	Streb.4G022060.1	C78A5	Cytochrome P450 78A5 OS=Arabidopsis	-1.87944	0.00610407	UE
	Streb.9G023090.1	BRN2	Protein BEARSKIN2 OS=Arabidopsis thaliana	-2.71226	0.0109858	UE
	Streb.Contig02416G000010.1	N/A	N/A	-5.96381	0.0445543	UE
	Streb.5G003220.1	PDLP6	Plasmodesmata-located protein 6 OS=Arabidopsis	-1.81314	0.00269909	UE
	Streb.6G013920.1	PTR27	Protein NRT1/ PTR FAMILY	-1.80316	1.71691e-08	UE
	Streb.1G037140.1	N/A	N/A	-1.53119	0.000822025	UE
	Streb.11G004160.1	N/A	N/A	-1.52352	0.0212044	UE
	Streb.1G015890.1	AP2	Floral homeotic protein APETALA	-2.29837	0.000272155	UE
	Streb.6G009390.1	GDL15	GDSL esterase/lipase At1g29670 OS=Arabidopsis	-1.49591	1.09979e-10	UE
	Streb.4G023800.1	PCH2	Pachytene checkpoint protein 2	-3.64158	0.00569458	UE
	Streb.1G021110.1	N/A	N/A	-1.77201	0.00807385	UE
	Streb.1G007080.1	AKR2	Probable aldo-keto reductase 2	-6.15964	3.98498e-13	UE
	Streb.11G028760.1	SPX1	SPX domain-containing protein 1	-1.53178	0.00246846	UE
	Streb.10G014640.1	BSD2	Protein BUNDLE SHEATH DEFECTIVE	-1.3372	1.85255e-06	UE
	Streb.Contig03477G000010.1	ZIP6	Zinc transporter 6, chloroplastic	-1.69136	6.77288e-23	UE
	Streb.5G003510.1	KIRO	Kirola OS=Actinidia deliciosa OX=3627	-10.5446	0.00689537	UE
	Streb.6G026600.1	NCL2	Sodium/calcium exchanger NCL2 OS=Oryza	-2.48831	0.00269362	UE
	Streb.8G000260.1	ZDHC6	Probable protein S-acyltransferase 16	-8.07525	0.0238022	UE
	Streb.2G059900.1	ASAT1	Acyl-CoA--sterol O-acyltransferase 1 OS=Arabidopsis	-4.90824	6.62514e-05	UE
	Streb.4G022370.1	IF5A	Eukaryotic translation initiation factor	-1.10891	2.95489e-05	UE
	Streb.3G023190.1	LSF1	Phosphoglucan phosphatase LSF1, chloroplastic	-2.82151	0.0168008	UE
	Streb.1G037360.1	SKM1	Leucine-rich repeat receptor-like serine/threonine-protein	-1.95283	0.000328336	UE
	Streb.10G012010.1	APO2	APO protein 2, chloroplastic	-1.52587	3.6648e-05	UE
	Streb.11G019560.1	N/A	N/A	-6.32602	8.37004e-19	UE
	Streb.2G013120.1	UGT83A1	UDP-glycosyltransferase 83A1 OS=Arabidopsis thaliana	-1.87802	5.16895e-11	UE
	Streb.8G027140.1	N/A	N/A	-2.98263	0.00632056	UE
	Streb.5G030770.1	N/A	N/A	-2.27309	0.0199344	UE
	Streb.1G022730.1	MBR2	E3 ubiquitin-protein ligase MBR2	-1.48631	2.71071e-38	UE
	Streb.7G008390.1	ACT11	Actin-97 OS=Solanum tuberosum OX=4113	-2.36479	4.42282e-11	UE
	Streb.5G018030.1	PCP	Lysosomal Pro-X carboxypeptidase OS=Pongo	-1.31263	0.00285524	UE
	Streb.2G059050.1	N/A	N/A	-1.94993	0.00192526	UE
	Streb.4G026340.1	N/A	N/A	-2.23965	9.07268e-05	UE
	Streb.10G005430.1	BRG3	Probable BOI-related E3 ubiquitin-protein	-1.34659	7.54077e-06	UE
	Streb.1G014310.1	IF2B	Eukaryotic translation initiation factor	-6.51399	0.00521053	UE
	Streb.Contig03483G000010.1	GDL15	GDSL esterase/lipase At1g29670 OS=Arabidopsis	-3.30579	0.0142645	UE
	Streb.8G021070.1	DOF24	Dof zinc finger protein	-1.62541	4.59287e-10	UE
	Streb.4G022500.1	CA4	Chlorophyll a-b binding protein	-1.97989	3.44532e-05	UE
	Streb.1G034620.1	SCD2	Coiled-coil domain-containing protein SCD2	-8.91626	0.00456916	UE
	Streb.4G022520.1	CDF1	Cyclic dof factor 1	-1.69506	0.0113732	UE
	Streb.Contig04131G000020.1	UGT92A1	UDP-glycosyltransferase 92A1 OS=Arabidopsis thaliana	-2.62572	0.0141316	UE
	Streb.8G006320.1	PUB9	U-box domain-containing protein 9	-1.14261	9.69979e-06	UE
	Streb.Contig03898G000020.1	GSTFA	Glutathione S-transferase F10 OS=Arabidopsis	-1.83868	0.00162711	UE
	Streb.2G027370.1	N/A	N/A	-1.7429	0.000937354	UE
	Streb.6G010630.1	TF25	Transposon Tf2-5 polyprotein OS=Schizosaccharomyces	-5.88955	1.24971e-05	UE
	Streb.1G029470.1	PRS6B	26S proteasome regulatory subunit	-1.21135	4.42227e-20	UE
	Streb.5G018260.1	POL3	Retrovirus-related Pol polyprotein from	-1.46936	0.0260094	UE
	Streb.6G026330.1	ARFC	Auxin response factor 3	-2.26203	4.3478e-06	UE
	Streb.9G027000.1	SCP18	Serine carboxypeptidase-like 18 OS=Arabidopsis	-1.70706	0.00299698	UE
	Streb.9G016400.1	SAP	Transcriptional regulator STERILE APETALA	-11.0674	0.00105092	UE
	Streb.2G031370.1	N/A	N/A	-2.25084	8.64181e-05	UE
	Streb.2G028040.1	AMPL2	Leucine aminopeptidase 2, chloroplastic	-2.49529	1.8594e-06	UE
	Streb.Contig00940G000040.1	N/A	N/A	-12.5592	2.67242e-12	UE
	Streb.1G049260.1	RUN1	Disease resistance protein RUN1	-1.35026	7.28194e-08	UE
	Streb.2G034380.1	XIAO	Probable inactive leucine-rich repeat	-2.36861	4.68237e-12	UE
	Streb.1G002470.1	COI1	Coronatine-insensitive protein 1 OS=Arabidopsis	-1.12032	3.24611e-08	UE
	Streb.6G017860.1	T4149	Cytochrome P450 Tp4149 OS=Tanacetum	-8.06378	0.000179536	UE
	Streb.3G025400.1	REV	Homeobox-leucine zipper protein REVOLUTA	-2.0464	0.00571924	UE
	Streb.9G018550.1	N/A	N/A	-1.78048	0.00405696	UE
	Streb.9G006790.1	RAP23	Ethylene-responsive transcription factor RAP2-3	-2.02576	0.0033234	UE
	Streb.5G017290.1	CAND7	Protein CANDIDATE G-PROTEIN COUPLED	-1.23684	5.38105e-12	UE
	Streb.7G004320.1	FDL1	F-box/FBD/LRR-repeat protein At1g13570 OS=Arabidopsis	-1.82578	0.00618112	UE
	Streb.9G002790.1	SHT	Spermidine hydroxycinnamoyl transferase OS=Arabidopsis	-8.02811	0.0166319	UE
	Streb.8G009510.1	PRIN2	Protein PLASTID REDOX INSENSITIVE	-1.86847	0.00330318	UE
	Streb.8G010760.1	N/A	N/A	-4.533	0.000229636	UE
	Streb.9G001100.1	N/A	N/A	-2.23205	0.0139008	UE
	Streb.9G019550.1	CPL1	RNA polymerase II C-terminal	-1.42055	9.70973e-08	UE
	Streb.3G006010.1	LACS4	Long chain acyl-CoA synthetase	-2.23712	1.34963e-05	UE
	Streb.11G009920.1	CO040	UPF0235 protein C15orf40 homolog	-1.26487	5.63615e-08	UE
	Streb.Contig03513G000010.1	N/A	N/A	-5.37601	0.00089383	UE
	Streb.Contig03867G000020.1	BH048	Transcription factor bHLH48 OS=Arabidopsis	-7.09121	2.40974e-07	UE
	Streb.11G015120.1	TCP13	Transcription factor TCP13 OS=Arabidopsis	-1.57325	0.00207441	UE
	Streb.9G022440.1	WAKLB	Wall-associated receptor kinase-like 2	-2.85693	3.20186e-10	UE
	Streb.5G027720.1	FIMB5	Fimbrin-5 OS=Arabidopsis thaliana OX=3702	-3.08165	0.0248609	UE
	Streb.9G022860.1	N/A	N/A	-6.35082	0.00630383	UE
	Streb.11G000930.1	BCA2	Beta carbonic anhydrase 2,	-1.81265	0.00484069	UE
	Streb.7G015430.1	N/A	N/A	-4.49191	9.12507e-12	UE
	Streb.9G000320.1	AHL18	AT-hook motif nuclear-localized protein	-7.73083	0.0190004	UE
	Streb.4G003160.1	Y1686	Uncharacterized membrane protein At1g16860	-1.74182	0.000615545	UE
	Streb.11G004790.1	SEC14	Sec14 cytosolic factor OS=Schizosaccharomyces	-1.44325	0.000751332	UE
	Streb.10G027710.1	PP191	Pentatricopeptide repeat-containing protein At2g37310	-1.83872	2.54726e-06	UE
	Streb.9G020890.1	N/A	N/A	-6.79563	0.0175084	UE
	Streb.5G014950.1	T2EA	Transcription initiation factor IIE	-1.17489	0.00510805	UE
	Streb.11G029360.1	Y2267	Probable inactive receptor kinase	-1.91864	1.1719e-06	UE
	Streb.5G007970.1	Y4729	G-type lectin S-receptor-like serine/threonine-protein	-1.47377	0.000973475	UE
	Streb.5G024520.1	RAP24	Ethylene-responsive transcription factor RAP2-4	-1.85806	9.88648e-05	UE
	Streb.8G019020.1	ERF5	Ethylene-responsive transcription factor 5	-10.6558	0.000372344	UE
	Streb.1G004540.1	N/A	N/A	-7.18046	0.0100389	UE
	Streb.4G023690.1	AMO2	Copper methylamine oxidase OS=Arthrobacter	-1.46198	2.6385e-05	UE
	Streb.9G032440.1	N/A	N/A	-4.26516	2.62665e-06	UE
	Streb.10G017470.1	REL2	Protein ROLLING AND ERECT	-2.34986	1.46446e-39	UE
	Streb.4G025300.1	NSA2	Ribosome biogenesis protein NSA2	-1.62068	1.44386e-15	UE
	Streb.4G009600.1	PUB44	U-box domain-containing protein 44	-10.5988	0.00131126	UE
	Streb.8G008610.1	FSTL	Flavonol sulfotransferase-like OS=Flaveria bidentis	-7.74924	0.00684834	UE
	Streb.8G028740.1	BIG1E	Protein BIG GRAIN 1-like	-6.38526	2.10622e-20	UE
	Streb.Contig04126G000030.1	SYPM	Proline--tRNA ligase, chloroplastic/mitochondrial OS=Arabidopsis	-2.00038	1.72715e-10	UE
	Streb.4G007380.1	FLZ3	FCS-Like Zinc finger 3	-1.56875	0.000443188	UE
	Streb.1G026580.1	CHUP1	Protein CHUP1, chloroplastic OS=Arabidopsis	-1.33316	2.69358e-06	UE
	Streb.11G012410.1	PPA3	Purple acid phosphatase 3	-8.6645	1.08892e-06	UE
	Streb.11G016800.1	N/A	N/A	-1.50926	4.07286e-07	UE
	Streb.1G041990.1	TPS5	(-)-germacrene D synthase OS=Matricaria	-3.13855	0.000137837	UE
	Streb.10G019930.1	SMO11	Methylsterol monooxygenase 01-gen OS=Arabidopsis	-7.92541	0.00988535	UE
	Streb.6G002770.1	N/A	N/A	-2.10146	0.013232	UE
	Streb.3G027590.1	N/A	N/A	-1.5594	0.0232328	UE
	Streb.2G012750.1	N/A	N/A	-1.19813	2.41946e-06	UE
	Streb.10G008290.1	RAP23	Ethylene-responsive transcription factor RAP2-3	-1.82963	0.000156422	UE
	Streb.2G014010.1	AB7A	ABC transporter A family	-11.5506	0.000786522	UE
	Streb.2G043330.1	Y3264	Putative UPF0481 protein At3g02645	-2.30426	0.00710466	UE
	Streb.7G016700.1	N/A	N/A	-1.72885	4.86362e-05	UE
	Streb.Contig05342G000010.1	N/A	N/A	-8.33042	0.00806256	UE
	Streb.1G040230.1	Y4826	Uncharacterized protein At4g18257 OS=Arabidopsis	-10.7792	2.94683e-10	UE
	Streb.10G004250.1	HAT4	Homeobox-leucine zipper protein HAT4	-1.28784	0.00185302	UE
	Streb.9G023640.1	N/A	N/A	-2.51448	0.0151195	UE

## Sheet: ST3
		Supplementary Table 3. List of common DEGs of pairwise comparison between four genotypes of stevia divided in functional classes by MapMan analysis.
		Bin name	MapMan BinCode	Transcript id	MapMan description	log2FC
		Secondary metabolites	16.2.2.7	Streb.8G008490.1	component Sm-G of U1/U2/U4/U5-associated Sm accessory ribonucleoprotein complex	2.23044
			16.2.5.2.8	Streb.5G014700.1	component MOS2 of non-snRNP MOS4-associated complex	3.27874
			16.2.6.2	Streb.1G020400.1	RNA splicing factor (SCL28/30/33)	3.27948
			16.4.2.1.2.5	Streb.contig00691G000010.1	component NOT3/5 of mRNA deadenylation CCR4-NOT complex	1.38523
		Redox homeostasis	10.4.3.5	Streb.10G026350.1	atypical thioredoxin (ACHT)	-14.3564
			10.3.3.2	Streb.5G014400.1	class theta glutathione S-transferase	-6.45814
			10.2.3	Streb.8G003670.1	glutathione peroxidase	-2.18544
			10.3.3.4	Streb.contig03898G000020.1	class phi glutathione S-transferase	-1.83868
			10.3.3.3	Streb.9G009420.1	class tau glutathione S-transferase	-1.8004
			10.1.1	Streb.9G000900.1	NADPH-oxidase (Rboh)	1.09681
			10.6.3	Streb.11G026330.1	homogentisate phytyltransferase (VTE2/HPT)	1.54974
			10.5.1	Streb.10G030740.1	ascorbate peroxidase (APX)	2.03951
			10.2.3	Streb.10G009910.1	glutathione peroxidase	7.22357
		Phytohormone action	11.1.4.1	Streb.4G022830.1	abscisic acid transporter (AIT)	-3.13743
			11.6.3.4	Streb.9G016060.1	gibberellin 2-oxidase	-2.1467
			11.2.2.2	Streb.10G018580.1	transcriptional repressor (IAA/AUX)	-1.783
			11.10.2.3.1	Streb.1G025890.1	EPF/EPFL precursor polypeptide	-1.61892
			11.5.1.2	Streb.9G018450.1	1-aminocyclopropane-1-carboxylate (ACC) oxidase	-1.53675
			11.2.2.2	Streb.1G027290.1	transcriptional repressor (IAA/AUX)	-1.53523
			11.3.2.4	Streb.1G014640.1	transcription factor (BES/BZR)	-1.53142
			11.10.2.4.2	Streb.5G029760.1	RALF-peptide receptor (CrRLK1L)	-1.45903
			11.4.1.2	Streb.7G027820.1	cytokinin phosphoribohydrolase	-1.42032
			11.2.2.3	Streb.2G060980.1	auxin signalling transcriptional co-repressor (TPL/TPR)	-1.1731
			11.7.2.1.1	Streb.1G002470.1	component COI of jasmonic acid receptor complex	-1.12032
			11.2.2.4	Streb.11G025990.1	auxin signal mediator (ARF7/ARF19)	-1.08897
			11.10.2.4.2	Streb.7G008260.1	RALF-peptide receptor (CrRLK1L)	1.49186
			11.7.1.2	Streb.5G019770.1	13-lipoxygenase (LOX)	1.52011
			11.3.1.3	Streb.8G034480.1	steroid 5-alpha-reductase (DET2)	1.75664
			11.2.4.1.1	Streb.11G002860.1	auxin transporter (PIN)	2.0845
			11.4.1.1	Streb.1G027100.1	adenylate isopentenyltransferase	2.99718
			11.1.2.1.2	Streb.1G015080.1	abscisic acid receptor recruitment factor (CAR)	8.69898
			11.4.3.1	Streb.1G050150.1	UDP-dependent glycosyl transferase	9.89217
		RNA biosynthesis	15.5.46	Streb.9G016400.1	transcription factor (SAP)	-11.0674
			15.5.7.1	Streb.8G019020.1	transcription factor (ERF)	-10.6558
			15.5.8.1	Streb.9G000320.1	AHL clade-A transcription factor	-7.73083
			15.5.7.2	Streb.5G021610.1	transcription factor (DREB)	-7.51601
			15.5.7.1	Streb.contig03077G000050.1	transcription factor (ERF)	-7.27646
			15.5.30	Streb.contig03867G000020.1	transcription factor (bHLH)	-7.09121
			15.5.12	Streb.1G039730.1	transcription factor (GRAS)	-5.57331
			15.5.3.6	Streb.1G036570.1	transcription factor (WOX)	-4.4236
			15.5.15	Streb.11G004290.1	C2H2 zinc finger transcription factor	-4.15026
			15.1.2.2	Streb.6G033020.1	subunit 2 of Pol II RNA polymerase	-3.50602
			15.5.30	Streb.6G030040.1	transcription factor (bHLH)	-3.48722
			15.1.2.2	Streb.6G032660.1	subunit 2 of Pol II RNA polymerase	-3.24486
			15.5.5.1	Streb.3G029480.1	transcription factor (ARF)	-2.84316
			15.5.17	Streb.9G023090.1	transcription factor (NAC)	-2.71226
			15.5.4.1	Streb.7G021050.1	transcription factor (bZIP)	-2.67357
			15.5.1.4	Streb.9G003220.1	transcription factor (YABBY)	-2.6532
			15.5.7.3	Streb.1G015890.1	transcription factor (AP2)	-2.29837
			15.5.5.1	Streb.6G026330.1	transcription factor (ARF)	-2.26203
			15.5.4.1	Streb.1G015330.1	transcription factor (bZIP)	-2.23503
			15.5.14	Streb.4G005420.1	transcription factor (MADS/AGL)	-2.17322
			15.5.3.2	Streb.3G025400.1	transcription factor (HD-ZIP III)	-2.0464
			15.3.3.5.2.3	Streb.6G025270.1	component TFB3 of TFIIh basal transcription factor complex	-2.03845
			15.5.7.1	Streb.9G006790.1	transcription factor (ERF)	-2.02576
			15.5.30	Streb.1G028440.1	transcription factor (bHLH)	-1.95932
			15.5.15	Streb.3G025260.1	C2H2 zinc finger transcription factor	-1.91276
			15.5.2.1	Streb.4G022610.1	transcription factor (MYB)	-1.89964
			15.6.1.2.3.9	Streb.8G009510.1	component PRIN2 of plastid-encoded RNA polymerase	-1.86847
			15.5.7.2	Streb.5G024520.1	transcription factor (DREB)	-1.85806
			15.5.7.1	Streb.10G008290.1	transcription factor (ERF)	-1.82963
			15.5.1.5	Streb.4G022520.1	transcription factor (DOF)	-1.69506
			15.5.1.5	Streb.8G021070.1	transcription factor (DOF)	-1.62541
			15.5.7.1	Streb.2G060220.1	transcription factor (ERF)	-1.58899
			15.5.4.2	Streb.11G023320.1	transcription factor (DOG)	-1.58234
			15.5.43	Streb.9G008860.1	transcription factor (TIFY)	-1.58231
			15.5.3.5	Streb.9G006670.1	transcription factor (BEL)	-1.57799
			15.5.19	Streb.11G015120.1	transcription factor (TCP)	-1.57325
			15.5.2.2	Streb.1G030450.1	transcription factor (MYB-related)	-1.55412
			15.5.37	Streb.1G014640.1	transcription factor (BZR)	-1.53142
			15.5.1.3.1	Streb.5G018140.1	transcription factor (A/B-GATA)	-1.5276
			15.5.3.12	Streb.2G057510.1	transcription factor (zf-HD)	-1.48441
			15.5.2.3	Streb.contig00657G000010.1	G2-like GARP transcription factor	-1.43179
			15.3.2.2	Streb.9G019550.1	RNA polymerase-II phosphatase	-1.42055
			15.5.2.2	Streb.2G050130.1	transcription factor (MYB-related)	-1.41422
			15.5.7.1	Streb.6G032820.1	transcription factor (ERF)	-1.39459
			15.5.7.1	Streb.6G032470.1	transcription factor (ERF)	-1.39416
			15.5.30	Streb.1G046590.1	transcription factor (bHLH)	-1.32672
			15.5.3.1	Streb.10G004250.1	transcription factor (HD-ZIP I/II)	-1.28784
			15.5.2.3	Streb.1G003070.1	G2-like GARP transcription factor	-1.25798
			15.5.1.2	Streb.6G031620.1	transcription factor (BBX-CO)	-1.25311
			15.3.5.6	Streb.7G008580.1	TFIIs transcription elongation factor	-1.21748
			15.5.30	Streb.6G015170.1	transcription factor (bHLH)	-1.21157
			15.3.3.3.1	Streb.5G014950.1	subunit alpha of TFIIe basal transcription factor complex	-1.17489
			15.5.51.1	Streb.2G060980.1	transcriptional co-repressor (TPL/TPR)	-1.1731
			15.3.3.5.1.2	Streb.5G019270.1	component SSL1 of TFIIh basal transcription factor complex	-1.12995
			15.5.44	Streb.7G001920.1	transcription factor (FRS/FRF)	-1.11516
			15.5.5.1	Streb.11G025990.1	transcription factor (ARF)	-1.08897
			15.5.51.5	Streb.7G025220.1	transcriptional repressor (NF-X1)	1.09521
			15.5.4.4.1	Streb.8G014960.1	transcription factor (TGA)	1.18675
			15.5.15	Streb.3G007950.1	C2H2 zinc finger transcription factor	1.31589
			15.5.44	Streb.7G001770.1	transcription factor (FRS/FRF)	1.33973
			15.6.2.2	Streb.9G028140.1	transcription factor (mTERF)	1.38877
			15.5.35	Streb.5G032820.1	transcription factor (OFP)	1.40174
			15.5.7.1	Streb.8G019070.1	transcription factor (ERF)	1.55151
			15.5.30	Streb.11G018430.1	transcription factor (bHLH)	1.56972
			15.5.2.1	Streb.2G014820.1	transcription factor (MYB)	1.79622
			15.5.6.2	Streb.9G024420.1	transcription factor (NLP)	1.82592
			15.5.22.1	Streb.11G026580.1	transcription factor (WRKY)	2.07774
			15.5.4.4.1	Streb.7G006760.1	transcription factor (TGA)	2.17082
			15.5.22.1	Streb.11G026420.1	transcription factor (WRKY)	2.17264
			15.5.4.1	Streb.2G013060.1	transcription factor (bZIP)	2.17714
			15.5.22.1	Streb.3G012150.1	transcription factor (WRKY)	2.61931
			15.5.24	Streb.9G031350.1	transcription factor (AS2/LOB)	2.8771
			15.5.4.4.1	Streb.2G058200.1	transcription factor (TGA)	2.99101
			15.5.30	Streb.1G020020.1	transcription factor (bHLH)	3.14178
			15.5.2.3	Streb.1G042170.1	G2-like GARP transcription factor	4.17574
			15.5.13	Streb.3G009310.1	transcription factor (HSF)	4.62793
			15.5.16	Streb.7G010060.1	C3H zinc finger transcription factor	6.43692
			15.5.2.1	Streb.10G031370.1	transcription factor (MYB)	6.57164
			15.3.4.4.2.2	Streb.1G043590.1	component MED7 of middle module of MEDIATOR transcription co-activator complex	8.63278
			15.5.30	Streb.contig04990G000010.1	transcription factor (bHLH)	12.2863
			15.6.1.2.3.7	Streb.2G052090.1	cofactor of plastid-encoded RNA polymerase (TAC17)	13.8697

## Sheet: ST4
			Supplementary Table 4. Origin of S. rebaudiana genotypes used in this study.
		Genotype	Origin
		PL	Israel
		SL	Israel
		L34	Italy
		RG	Italy
